# Supplementary material
Source: PubMed Central journal article supplement (PMC5551982)

## Supplementary documents

**Table S1** Definition criteria of each predictive variable

| Findings                | Definition in this study                                                                                                                                    |
|-------------------------|-------------------------------------------------------------------------------------------------------------------------------------------------------------|
| Clinical manifestations |                                                                                                                                                             |
| Abdominal pain          | The terms "abdominal pain", "abdominal pain in history of current complaint", "pain abdomen", and "pain" were included.                                     |
| Diarrhea                | The terms "diarrhea", "current watery diarrhea", and "chronic diarrhea" were included.                                                                      |
| Hematochezia            | The terms "hematochezia", "bloody stool", "blood in stools", and "rectal bleeding" were included.                                                           |
| Perianal disease        | The terms "perianal disease", "perianal lesions", "anal fistula", "perianal fistula", "fistula in ano", and "anorectal lesion" were included.               |
| Intestinal obstruction  | The terms "intestinal obstruction", "partial bowel obstruction", "incomplete intestinal obstruction", and "recurrent intestinal obstruction" were included. |
| Abdominal mass          | The terms "abdominal mass", "abdominal lump", and "right iliac fossa mass" were included.                                                                   |
| Fever                   | The terms "fever", "recent fever" were included. For the data presented as "mild fever" and "severe fever", the total number patients was recorded.(30)     |

|                                |                                                                                                                                                                                                                                                                                                                                                                                                                                                     |
|--------------------------------|-----------------------------------------------------------------------------------------------------------------------------------------------------------------------------------------------------------------------------------------------------------------------------------------------------------------------------------------------------------------------------------------------------------------------------------------------------|
| Weight loss                    | The terms “weight loss” and “weight loss in history of current complaint” were included.                                                                                                                                                                                                                                                                                                                                                            |
| Night sweats                   | The terms “night sweats” and “night sweat” were included.                                                                                                                                                                                                                                                                                                                                                                                           |
| Anemia                         | Anemia was defined by either clinical manifestations/features or laboratory features, and it was reported as a dichotomous variable (“yes” or “no”).                                                                                                                                                                                                                                                                                                |
| Lung involvement               | Lung involvement was defined by either clinical manifestations/features or imaging findings. The terms “pulmonary tuberculosis”, “pulmonary involvement”, “positive of chest X-ray”, “abnormal pulmonary X-ray findings”, “pulmonary infiltration/fibrosis”, and “presence of pulmonary infiltration/fibrosis/nodule on chest X-ray/CT” were included.                                                                                              |
| Ascites                        | Ascites was defined by either clinical manifestations/features or imaging findings. The term “ascites” was included.                                                                                                                                                                                                                                                                                                                                |
| Extraintestinal manifestations | The terms “any extraintestinal manifestations”, “extraintestinal manifestations”, “extra-intestinal features”, and “extraintestinal symptoms” were included. Some studies included only immunologic phenomenon such as arthritis, pyoderma gangrenosum, erythema nodosum, aphthous stomatitis, episcleritis, uveitis, and PSC. Some included thromboembolic events. Some included fatty liver. Some did not provide detail of which extraintestinal |

|                               |                                                                                                                                                   |
|-------------------------------|---------------------------------------------------------------------------------------------------------------------------------------------------|
|                               | manifestations included.                                                                                                                          |
| Endoscopic findings           |                                                                                                                                                   |
| Longitudinal ulcers           | The terms “longitudinal ulcers”, “linear ulcers”, “deep linear/serpiginous ulcers”, and “fissure-shape ulcer” were included.                      |
| Transverse ulcers             | The terms “transverse ulcers”, “circumferential ulcers”, “circular ulcers”, and “ring-like ulcers” were included.                                 |
| Aphthous ulcers               | The terms “aphthous ulcers” and “aphthoid ulcers” were included.                                                                                  |
| Cobblestone appearance        | The terms “cobblestone appearance”, “cobblestone pattern”, “cobblestone sign”, “cobblestone-some appearance”, and “cobble stoning” were included. |
| Patulous ileocecal (IC) valve | The terms “patulous IC valve”, “deformation of IC valve”, “persistent open IC valves”, and “fixed-open IC valve” were included.                   |
| Pseudopolyps                  | The terms “pseudopolyps” and “scars or pseudopolyps” were included.                                                                               |
| Intestinal stricture          | The terms “stricture”, “strictures of bowel” and “lumen stenosis” were included.                                                                  |
| Mucosal bridge                | The terms “mucosal bridge” was included.                                                                                                          |
| Skip lesions                  | The terms “skip lesions” was included.                                                                                                            |
| Nodularity                    | The terms “nodularity” and “mucosal nodularity” were                                                                                              |

|                                      |                                                                                                                                                                                                                                                   |
|--------------------------------------|---------------------------------------------------------------------------------------------------------------------------------------------------------------------------------------------------------------------------------------------------|
|                                      | included.                                                                                                                                                                                                                                         |
| Pathological findings                |                                                                                                                                                                                                                                                   |
| Presence of granuloma(s)             | The presence of granuloma.                                                                                                                                                                                                                        |
| Confluent granuloma                  | The terms “confluent granulomas” and “confluence” in the section on granulomas were included.                                                                                                                                                     |
| Large granuloma                      | The definition of large granuloma was different among each study with a range of 200 to 500 micrometers. This detail was shown in a forest plot.                                                                                                  |
| Multiple granulomas per section      | The definition of multiple granulomas per section was different among each study with a range of “> 1/section” to “≥5/section”. The terms of “more than 5” or “≥5” granulomas per section were included because they were reported most commonly. |
| Mucosal granuloma                    | The terms “granuloma in mucosa” and “mucosal granulomas” were included.                                                                                                                                                                           |
| Submucosal granuloma                 | The terms “granuloma in submucosa” and “submucosal granulomas” were included.                                                                                                                                                                     |
| Microgranuloma                       | The term “microgranuloma” was included.                                                                                                                                                                                                           |
| Cuffing lymphocytes around granuloma | The terms “cuffing of lymphocytes around granuloma” and “lymphoid cuff” were included.                                                                                                                                                            |
| Ulcer lined by                       | The terms “ulcers lined by histiocytes”, “ulcer with                                                                                                                                                                                              |



|                                               |                                                                                                                                                          |
|-----------------------------------------------|----------------------------------------------------------------------------------------------------------------------------------------------------------|
| histiocytes                                   | histiocytes”, “ulcer with epithelioid histiocytes”, and “band of epithelioid histiocytes in ulcer base” were included.                                   |
| Disproportionate submucosal inflammation      | The term “disproportionate submucosal inflammation” was included.                                                                                        |
| Focally enhanced colitis                      | The term “focally enhanced colitis” was included.                                                                                                        |
| CT enterography findings                      |                                                                                                                                                          |
| Short segmental involvement                   | The terms “length of involvement < 3 cm”, “length of involvement < 5 cm”, and “focal ileocecal lesion” were included.                                    |
| Wall stratification                           | The term “mural stratification” was included.                                                                                                            |
| Asymmetrical wall thickening                  | The terms “asymmetrical bowel wall thickening” and “asymmetric pattern of involvement (in morphology of involved bowel segments section)” were included. |
| Comb sign                                     | The term “comb sign” was included.                                                                                                                       |
| Fibrofatty proliferation                      | The terms “fibrofatty proliferation” and “fat proliferation” in mesenteric changes section were included.                                                |
| Serological tests                             |                                                                                                                                                          |
| Interferon- $\gamma$ releasing assay          | Both T-SPOT.TB and QuantiFERON-TB Gold were included                                                                                                     |
| <u>Anti-Saccharomyces cerevisiae antibody</u> | ASCA IgG(1, 3, 33, 55) and ASCA IgG/IgA(2, 38, 56) were included                                                                                         |

|        |  |
|--------|--|
| (ASCA) |  |
|--------|--|

**Table S2 Summary of all studies**

| Author, year             | D | Subjects                                                                                   | Criteria CD                                                                                                                                                                                                                                                                                                                                                                                                                                    | Criteria ITB                                                                                                                                                                                                                                                                                                                                                                                                                                                                                      | Site                                                                                                | Findings                                                                                                                                                                                                                                                                                                                                                                                                     |
|--------------------------|---|--------------------------------------------------------------------------------------------|------------------------------------------------------------------------------------------------------------------------------------------------------------------------------------------------------------------------------------------------------------------------------------------------------------------------------------------------------------------------------------------------------------------------------------------------|---------------------------------------------------------------------------------------------------------------------------------------------------------------------------------------------------------------------------------------------------------------------------------------------------------------------------------------------------------------------------------------------------------------------------------------------------------------------------------------------------|-----------------------------------------------------------------------------------------------------|--------------------------------------------------------------------------------------------------------------------------------------------------------------------------------------------------------------------------------------------------------------------------------------------------------------------------------------------------------------------------------------------------------------|
| Liu TH, 1981(28)         | R | 40 CD, 53 ITB<br><br>Surgically treated patients, Selected cases from a total of 300 cases | Absence of caseous necrosis, noncaseous granuloma, if present, being scanty and not confluent; good sampling of bowel lesions and lymph nodes                                                                                                                                                                                                                                                                                                  | Presence of caseous necrosis in either the bowel wall or in the regional lymph nodes; good sampling of bowel lesion and lymph nodes                                                                                                                                                                                                                                                                                                                                                               | Capital Hospital, Chinese Academy of Medical Sciences, Beijing, China<br><br>1949 to September 1979 | Fissuring ulcer, widening of submucosa and cobblestone appearance are distinctive diagnostic features of CD. Caseous necrosis and/or presence of AFB are hallmark of ITB.                                                                                                                                                                                                                                    |
| Zhou ZY, 2006(46)        | R | 30 CD, 30 ITB<br><br>Consecutive patients                                                  | Pathological specimens obtained through colonoscopy, fine needle aspiration biopsy or open surgery.                                                                                                                                                                                                                                                                                                                                            | Pathological specimens obtained through colonoscopy, fine needle aspiration biopsy or open surgery.                                                                                                                                                                                                                                                                                                                                                                                               | Renmin Hospital of Wuhan University<br><br>January 1990-April 2004                                  | Some cardinal symptomatic and physical, radiographic and colonoscopic features of CD and ITb were positive correlation (Pearson correlation score = 0.976, 0.953, and 0.061, respectively, p=0.000, 0.003, and 0.000).<br><br>Some histological features of CD and ITb had no correlation (Pearson correlation score = 0.14, p=0.765).                                                                       |
| Amarapurkar DN, 2008(33) | P | 26 CD, 26 ITB<br><br>Consecutive CD patients with equal number of ITB patients.            | Based on morphological (radiological, endoscopic or surgical findings) and pathological criteria suggesting focal, asymmetrical, transmural or granulomatous features: exclusion of TB (by histology, microbiological and PCR studies) and complete resolution of symptoms and morphological (endoscopic and histological/microbiological) features after 1-year treatment of corticosteroid and 5-ASA preparations (with or without surgery). | Based on the following criteria: (1) presence of caseating granuloma on histology of diseased tissue (intestine, peritoneum or lymph nodes); (2)demonstration of AFB on smear or on histological section; (3) positive culture for AFB; (4)histological or microbiological confirmed TB at extraintestinal site; and (5) positive TB PCR. Complete resolution of symptoms and morphological (endoscopic and histological/microbiological) features after completion of standard ATT-(HERZ)2(HR)10 | Bombay Hospital and Medical Research center, Mumbai, India<br><br>January 2002-December 2004        | On multivariate analysis, duration of symptoms, diarrhea, bleeding per rectum, fever were the independent predictors to differentiate between CD and ITB.<br><br>Accuracy of predicting CD was 84.62% based on the fever, bleeding per rectum, diarrhoea and duration of symptoms<br><br>Accuracy of predicting GITB was 73.1% when there was co-existing pulmonary lesions and/or abdominal lymphadenopathy |
| Gu Q, 2009(35)           | R | 33 CD, 34 ITB<br>Inpatients                                                                | According to Cooperative Group of Inflammatory Bowel Disease of Chinese Medical Association 2001                                                                                                                                                                                                                                                                                                                                               | Combination of clinical, radiographic, endoscopic, and pathological findings, and response to ATT                                                                                                                                                                                                                                                                                                                                                                                                 | West China Hospital of Sichuan University<br><br>1996–2007                                          | On univariate analysis; Features favored CD: longer duration of symptoms, hematochezia, extra-intestinal manifestations, ileus, cobblestone sign and fissure-shape ulcers, stomach/jejunum/or ileal involvement.<br>Features favored ITB: night sweating, hypoalbuminemia, high ESR, positive for serum Ab to mycobacterium, circular ulcers, and presence of granulomas.                                    |
| Makharia GK, 2010(6)     | P | 53 CD, 53 ITB                                                                              | On the basis of the European Crohn 's and Colitis Organization guidelines                                                                                                                                                                                                                                                                                                                                                                      | On the basis of characteristic clinical features (abdominal pain, constipation and/or diarrhea, constitutional symptoms, and intestinal obstruction), endoscopic features (ileocecal area                                                                                                                                                                                                                                                                                                         | All India Institute of Medical Sciences, New Delhi, India,<br><br>60 months, but                    | On multivariate analysis, blood in stool (OR 0.1 (CI) 0.04–0.5)), weight loss (OR 9.8 (CI 2.2–43.9)), histologically focally enhanced colitis (OR 0.1 (CI 0.03–0.5)), and involvement of sigmoid colon (OR 0.07(0.01–                                                                                                                                                                                        |

|                       |   |                                                                                                                |                                                                                                                                                                                                                                                                                                                                                                                                                                                                                   |                                                                                                                                                                                                                                                                                                                                                                                                                                                                                                   |                                                                                                                                                                                                                                                                                                                                      |                                                                                                                                                                                                                                                                                                                                                                                                                                                                                                                                                                      |
|-----------------------|---|----------------------------------------------------------------------------------------------------------------|-----------------------------------------------------------------------------------------------------------------------------------------------------------------------------------------------------------------------------------------------------------------------------------------------------------------------------------------------------------------------------------------------------------------------------------------------------------------------------------|---------------------------------------------------------------------------------------------------------------------------------------------------------------------------------------------------------------------------------------------------------------------------------------------------------------------------------------------------------------------------------------------------------------------------------------------------------------------------------------------------|--------------------------------------------------------------------------------------------------------------------------------------------------------------------------------------------------------------------------------------------------------------------------------------------------------------------------------------|----------------------------------------------------------------------------------------------------------------------------------------------------------------------------------------------------------------------------------------------------------------------------------------------------------------------------------------------------------------------------------------------------------------------------------------------------------------------------------------------------------------------------------------------------------------------|
|                       |   |                                                                                                                |                                                                                                                                                                                                                                                                                                                                                                                                                                                                                   | involvement ulcerations, nodularity, and strictures), histological features (presence of granulomas) and microbiological tests (presence of AFB on the smear examination or demonstration of AFB by PCR), and response to ATT (Paustian's criteria with Logan's modification)                                                                                                                                                                                                                     | did not state the definite recruitment time                                                                                                                                                                                                                                                                                          | 0.3)) were independent predictors of ITB.<br>Scoring system predicted diagnosis had ROC of 0.9089 for development set, and 0.892 for validation data set.<br><br>Score = $(-2.5 \times \text{involvement of sigmoid colon}) - (2.1 \times \text{blood in stool}) + (2.3 \times \text{weight loss}) - (2.1 \times \text{focally enhanced colitis}) + 7$                                                                                                                                                                                                               |
| Pulimood AB, 2011(29) | R | 68 CD, 41 ITB<br><br>All were surgical cases with the indications of obtaining diagnosis or relief obstruction | Surgical specimens                                                                                                                                                                                                                                                                                                                                                                                                                                                                | Surgical specimens                                                                                                                                                                                                                                                                                                                                                                                                                                                                                | Christian Medical College, Vellore, Tamil Nadu, India<br><br>(Did not mention to year of recruitment; thus, potential to be the same patients as other studies by Pulimood et al.(31, 49) However, those studies presented only pathological findings, not clinical manifestations. Therefore, it is unlikely to be the copied data) | Recurrent intestinal obstruction and altered bowel habit were significant parameters for CD. Fever, pulmonary involvement, abdominal distention were significant parameters for ITB.                                                                                                                                                                                                                                                                                                                                                                                 |
| Dutta AK, 2011(1)     | P | 30 CD and 30 ITB                                                                                               | Based on a combination of clinical, radiological, endoscopic and histological features suggested by European evidence based consensus on the diagnosis and management of Crohn's disease                                                                                                                                                                                                                                                                                          | Based on the presence of any of the following features:<br>(I) Intestinal mucosal biopsy showing - a) AFB positive on histopathology or culture, and/or b) caseating granulomas, and/or c) large or confluent granulomas<br>(II) Response to treatment.                                                                                                                                                                                                                                           | Christian Medical College, Vellore, Tamil Nadu<br><br>Jan 2006-Oct 2007                                                                                                                                                                                                                                                              | Features commoner in CD were longer duration of symptoms, blood mixed stool, presence of longitudinal ulcers and skip lesions on colonoscopy and more number of colonic segments involved (p=0.004). Anorexia was commoner in ITB patients (p=0.008). Positive ASCA was commoner in CD (30%) than ITB (10%) but did not reach statistical significance (p=0.1).                                                                                                                                                                                                      |
| Li X, 2011(11)        | R | 130 CD and 122 ITB                                                                                             | Based on the clinical, radiographic, colonoscopic, and histologic features and accorded WHO criteria of CD which consists of six items:<br>(1) discontinuous or segmental lesions (assessed by radiology, endoscopy, or resected specimen);<br>(2) cobblestoning or longitudinal ulcers (assessed by radiology, endoscopy, or resected specimen);<br>(3) transmural inflammation (present when a mass is palpated clinically or in a resected specimen or a stricture was seen on | Fulfilled one or more of:<br>(1) presence of caseating granuloma on histology of diseased tissue (intestine, peritoneum, or lymph nodes);<br>(2) demonstration of AFB on smear or on histological section;<br>(3) positive culture for AFB; (4) histological or microbiological confirmed TB at extraintestinal site;<br>(5) positive TB PCR;<br>(6) highly suspected cases considered by the combination of clinical, ileo-colonoscopy and histological features, and sensitive response to ATT. | 3 centers in South China (Xiangya, 2nd Xiangya, the affiliated hospital university of Jishou)<br><br>June 2003 – February 2009                                                                                                                                                                                                       | The clinical features helpful in differentiating CD from ITB are hematochezia, intestinal surgery, perianal diseases, pulmonary tuberculosis, ascites, and positive of PPD skin test; the sensitivity, specificity, accuracy, PPV, and NPV of regression mathematical model established by clinical features were 90.3, 76.8, 83.8, 80.7, and 88.0%, respectively.<br><br>The endoscopic features helpful in differentiating CD from ITB were rectum involved lesions, longitudinal ulcer, cobblestone appearance, fixed-open ileocecal valve, transverse ulcer, and |

|                     |   |                                                                                           |                                                                                                                                                                                                                                                                                                                                                                                                                    |                                                                                                                                                                                                                                                                                                                                                                                                                                                                                                               |                                                                                           |                                                                                                                                                                                                                                                                                                                                                                                                                                                                             |
|---------------------|---|-------------------------------------------------------------------------------------------|--------------------------------------------------------------------------------------------------------------------------------------------------------------------------------------------------------------------------------------------------------------------------------------------------------------------------------------------------------------------------------------------------------------------|---------------------------------------------------------------------------------------------------------------------------------------------------------------------------------------------------------------------------------------------------------------------------------------------------------------------------------------------------------------------------------------------------------------------------------------------------------------------------------------------------------------|-------------------------------------------------------------------------------------------|-----------------------------------------------------------------------------------------------------------------------------------------------------------------------------------------------------------------------------------------------------------------------------------------------------------------------------------------------------------------------------------------------------------------------------------------------------------------------------|
|                     |   |                                                                                           | radiology, endoscopy, or resected specimen); (4) non-caseating granulomas (on histology); (5) fissures or fistulae (found on clinical examination and/or in radiology/ resected specimen); (6) perianal disorders (present clinically and/or in histology/ resected specimen). A definite diagnosis was made when either 1 + 2 + 3 were present with any one of 4/5/6 or when 4 was present with any two of 1/2/3. |                                                                                                                                                                                                                                                                                                                                                                                                                                                                                                               |                                                                                           | rodent ulcer; the sensitivity, specificity, accuracy, PPV, and NPV of regression mathematical model established by endoscopic features were 82.9, 82.0, 82.5, 82.9, and 82.0%, respectively.                                                                                                                                                                                                                                                                                |
| Yu H, 2012(12)      | R | 53 CD and 43 ITB                                                                          | According to the management consensus of CD of Europe and the Asia-Pacific region. All patients had been followed up $\geq 1$ year                                                                                                                                                                                                                                                                                 | Based on one or more of the following indications: (1)demonstration of caseating granuloma in histological sections, (2) radiological, and/or pathological evidence of active tuberculosis elsewhere and dramatic response to ATT, and (3) strong suspicion of tuberculosis by both clinical and histological characteristics, together with a sensitive response to ATT                                                                                                                                      | Nanfang Hospital, Guangong province, China<br><br>January 2001-December 2010              | On multivariate analysis, longitudinal ulcers was the independent factor for CD, and night sweat and presence of granuloma in tissue section. Using these factors building a model with ROC of 0.864 (95% CI 0.79-0.94)                                                                                                                                                                                                                                                     |
| Cheng L, 2013(34)   | R | 107 CD, 69 ITB                                                                            | According to Cooperative Group of Inflammatory Bowel Disease of Chinese Medical Association Response to Crohn's disease therapy with follow up period > 1 year                                                                                                                                                                                                                                                     | Clinical and endoscopic response (ulcers disappeared on follow up endoscopy) to standard ATT $\geq 6$ month without recurrence after follow up period $\geq 9$ -12 months<br>Presence of caseous granuloma on pathological sections                                                                                                                                                                                                                                                                           | Wuhan University, Wuhan, China<br><br>January 2011 to January 2012                        | Clinical and endoscopic scoring system including active pulmonary TB, positive PPD test, perianal disease, extraintestinal manifestations, involvement $\geq 4$ segments, rectal involvement, longitudinal ulcers, cobblestone appearance, and circular ulcers had a positive diagnostic rate for CD of 50.47% (54/107) and for ITB of 66.67% (46/69)                                                                                                                       |
| Liu YY, 2014(30)    | R | 38 CD and 30 ITB, retrospectively collected from medical records of hospitalized patients | According to Cooperative Group of Inflammatory Bowel Disease of Chinese Medical Association 2007                                                                                                                                                                                                                                                                                                                   | any of the following:<br>(1) presence of caseating granulomas on histology of disease tissue (intestine, peritoneum, or lymph nodes);<br>(2)demonstration of AFB on smear or on histological section;<br>(3) positive culture for AFB;<br>(4) histological or microbiological confirmed TB at extraintestinal site;<br>(5) positive result of TB-PCR;<br>(6) highly suspected cases considered by the combination of clinical, endoscopic, and histological features and sensitive response to anti-TB drugs. | Renmin Hospital and Zhongnan Hospital of Wuhan University<br><br>May 2007 to October 2012 | On univariate analysis, rural patients with abdominal pain as the first symptom and with transverse ulcer and caseating granulomas were more common in the ITB group than the CD group, whereas urban patients with stool change as the first symptom, moderate or severe anemia, thickening of intestinal wall, rectal involvement, skipping distribution, prominent lymphoid aggregates, and irregular glands were more common in CD group than ITB group ( $P < 0.05$ ). |
| Larsson G, 2014(13) | P | 37 CD and 38 ITB, prospectively consecutively collected. Exclude: HIV, malignancy         | Crohn's disease (as per ECCO guidelines 2010 and management consensus of inflammatory bowel disease for the Asia-Pacific region 2006)<br>- Exclusion of infectious enterocolitis<br>- Endoscopic: ileal disease, rectal sparing, confluent deep linear                                                                                                                                                             | Intestinal tuberculosis (as per modified Paustian's criteria: (a), and one or more of (b) and (c) had to be fulfilled)<br>(a) Endoscopic apparent intestinal tuberculosis: transverse ulcers, pseudopolyps, involvement of fewer than four intestinal                                                                                                                                                                                                                                                         | Four South India Medical Centers<br><br>Oct 2009-July2012                                 | On multivariate analysis, weight loss and nodularity of the mucosa were independently associated with ITB, with adjusted odds ratios of 8.6 (95%CI: 2.1-35.6) and 18.9 (95%CI: 3.5-102.8) respectively. Right lower abdominal quadrant pain on examination and involvement of $\geq 3$ intestinal                                                                                                                                                                           |

|                                              |   |                                                            |                                                                                                                                                                                                                                                                                                                                                                                           |                                                                                                                                                                                                                                                                                                                                                                                                                    |                                                                               |                                                                                                                                                                                                                                                                                                                                                                                                                                                                                                                                                                                                                                                                                                                    |
|----------------------------------------------|---|------------------------------------------------------------|-------------------------------------------------------------------------------------------------------------------------------------------------------------------------------------------------------------------------------------------------------------------------------------------------------------------------------------------------------------------------------------------|--------------------------------------------------------------------------------------------------------------------------------------------------------------------------------------------------------------------------------------------------------------------------------------------------------------------------------------------------------------------------------------------------------------------|-------------------------------------------------------------------------------|--------------------------------------------------------------------------------------------------------------------------------------------------------------------------------------------------------------------------------------------------------------------------------------------------------------------------------------------------------------------------------------------------------------------------------------------------------------------------------------------------------------------------------------------------------------------------------------------------------------------------------------------------------------------------------------------------------------------|
|                                              |   |                                                            | ulcers, aphthoid ulcers, deep fissures, fistulae, skip lesions (segmental disease), cobblestoning<br>- Histological: focal (discontinuous) chronic (lymphocytes and plasma cells) inflammation and patchy chronic inflammation, focal crypt irregularity (discontinuous crypt distortion) and granulomas (not related to crypt injury) Samples from ileum: irregular villous architecture | segments, patulous ileocecal valve<br>(b) Histological evidence of tubercles/granulomas with caseation necrosis in intestinal biopsies<br>(c) Clinical response to ATT trial                                                                                                                                                                                                                                       |                                                                               | segments were independently associated with CD with adjusted odds ratios of 10.1 (95%CI: 2.0-51.3) and 5.9 (95%CI: 1.7-20.6), respectively.                                                                                                                                                                                                                                                                                                                                                                                                                                                                                                                                                                        |
| Haung X, 2015(17)                            | P | Newly diagnosed 25 CD and 40 ITB, prospectively collected. | According to the WHO diagnostic criteria based on clinical, radiographic, colonoscopic, and histologic features                                                                                                                                                                                                                                                                           | According to the following criteria:<br>(1) the identification of <i>Mycobacterium tuberculosis</i> by acid-fast staining or culture of biopsied specimens;<br>(2) the presence of caseating granulomas on histological examination; and<br>(3) an improvement of clinical and endoscopic disease activity after at least 3 mo of anti-TB therapy.                                                                 | First Affiliated Hospital of Nanchang University<br><br>Aug 2011 to July 2012 | 12 features from univariate analysis, including longitudinal ulcers, nodular hyperplasia, cobblestone-like mucosa, intestinal diseases, intestinal fistula, the target sign, the comb sign, night sweats, the purified protein derivative test, the interferon- $\gamma$ release assay (T-SPOT.TB), ring ulcers and ulcer scars, were selected for the scoring system. Each feature gave +1 if favored CD or (-1) if favored ITB.<br>Total score of the CD group was $3.12 \pm 1.740$ , the average total score of the ITB group was $-2.58 \pm 0.984$ , the best cutoff value for the ROC curve was -0.5, and the diagnostic area under the curve was 0.997, which was statistically significant ( $P < 0.001$ ). |
| Singh B, 2015(48)                            | R | 303 CD and 203 ITB, retrieve all medical records           | On the basis of ECCO guidelines, using a combination of clinical, endoscopic, and histological features                                                                                                                                                                                                                                                                                   | On the basis of characteristic clinical features (abdominal pain, constitutional symptoms, and intestinal obstruction), endoscopic features (ileocecal area involvement, ulcerations, nodularity, and strictures), histological features (presence of granulomas) and microbiological tests (presence of AFB on smear examination or culture), and response to ATT (Paustian's criteria with Logan's modification) | All India Institute of Medical Sciences, New Delhi, India<br><br>2005-2012    | Relative to ITB, CD patients had higher frequencies of peripheral arthropathy ( $p < 0.001$ ), aphthous stomatitis ( $p = 0.01$ ), any EIM ( $p < 0.001$ ), and multiple EIMs ( $p < 0.001$ ).                                                                                                                                                                                                                                                                                                                                                                                                                                                                                                                     |
| Hatemi I, 2012(37)                           | R | 40 CD, 20 ITB<br><br>Case-control study                    | Unclear                                                                                                                                                                                                                                                                                                                                                                                   | Culture positive for MTB in stool or tissue. All cases were confirmed by post treatment colonoscopy                                                                                                                                                                                                                                                                                                                | Istanbul University, Turkey<br><br>December 1999-September 2011               | In a binary logistic regression model, fever, perforation, granuloma and high CRP levels were important to distinguish ITB from CD regarding endoscopic and radiologic findings.                                                                                                                                                                                                                                                                                                                                                                                                                                                                                                                                   |
| Study mainly focused on inflammatory markers |   |                                                            |                                                                                                                                                                                                                                                                                                                                                                                           |                                                                                                                                                                                                                                                                                                                                                                                                                    |                                                                               |                                                                                                                                                                                                                                                                                                                                                                                                                                                                                                                                                                                                                                                                                                                    |
| Liu S, 2013(36)                              | R | 29 CD, 30 ITB<br><br>Case-control study                    | Clinical manifestations, radiologic, endoscopic and pathological evidences                                                                                                                                                                                                                                                                                                                | Pathological findings, Ziehl-Neelsen staining and fluorescent quantitative PCR                                                                                                                                                                                                                                                                                                                                     | Medical School of Nanjing University, Jinling Hospital,                       | CRP was $20.2 \pm 4.26$ mg/dL in CD and $28.2 \pm 5.41$ mg/dL in ITB ( $P = 0.379$ ).<br>ESR was $23.8 \pm 3.18$ mm/hr in                                                                                                                                                                                                                                                                                                                                                                                                                                                                                                                                                                                          |



|                                                 |   |                                                                  |                                                                                                                                                                                                                                                                                                                                                                                                                                                                                                                                                  |                                                                                                                                                                                                                                                                                                                                                                                                                                |                                                                        |                                                                                                                                                                                                                                                                                                                                                                                                                                                                                                                                                                                                                                                                     |
|-------------------------------------------------|---|------------------------------------------------------------------|--------------------------------------------------------------------------------------------------------------------------------------------------------------------------------------------------------------------------------------------------------------------------------------------------------------------------------------------------------------------------------------------------------------------------------------------------------------------------------------------------------------------------------------------------|--------------------------------------------------------------------------------------------------------------------------------------------------------------------------------------------------------------------------------------------------------------------------------------------------------------------------------------------------------------------------------------------------------------------------------|------------------------------------------------------------------------|---------------------------------------------------------------------------------------------------------------------------------------------------------------------------------------------------------------------------------------------------------------------------------------------------------------------------------------------------------------------------------------------------------------------------------------------------------------------------------------------------------------------------------------------------------------------------------------------------------------------------------------------------------------------|
|                                                 |   |                                                                  |                                                                                                                                                                                                                                                                                                                                                                                                                                                                                                                                                  |                                                                                                                                                                                                                                                                                                                                                                                                                                | Nanjing, China<br>January 2008<br>and December<br>2011                 | CD and 27.6 ± 4.55 mm/hr in ITB<br>(p=0.832)                                                                                                                                                                                                                                                                                                                                                                                                                                                                                                                                                                                                                        |
| Study mainly focused on endoscopy               |   |                                                                  |                                                                                                                                                                                                                                                                                                                                                                                                                                                                                                                                                  |                                                                                                                                                                                                                                                                                                                                                                                                                                |                                                                        |                                                                                                                                                                                                                                                                                                                                                                                                                                                                                                                                                                                                                                                                     |
| Lee, YJ,<br>2006(10)                            | P | 44 CD, 44 ITB                                                    | At least two of the following criteria:<br>a) clinical history of abdominal pain, weight loss, malaise, diarrhea, and/or rectal bleeding;<br>b) endoscopic findings of mucosal cobblestoning, linear ulceration, skip areas, or perianal disease;<br>c) radiologic findings of stricture, fistula, mucosal cobblestoning, or ulceration;<br>d) macroscopic appearance of bowel-wall induration, mesenteric lymphadenopathy, and "creeping fat" at laparotomy;<br>e) pathologic findings of transmural inflammation and/or epithelioid granulomas | At least one of the following criteria:<br>a) histologic evidence of caseating granulomas;<br>b) histologic demonstration of AFB;<br>c) growth of MTB on tissue culture; d) clinical, colonoscopic, radiologic, and/or operative evidence of ITB with proved tuberculosis elsewhere;<br>e) response to ATT without subsequent recurrence in patients with clinical, colonoscopic, radiologic, and/or operative evidence of ITB | Asan Medical Center in Seoul, Korea<br><br>Jan 2001-Jan 2003           | 4 parameters were significantly more common in patients with CD: anorectal lesions, longitudinal ulcers, aphthous ulcers, and cobblestone appearance<br><br>4 parameters were significantly more common in ITB: involvement of fewer than 4 segments, a patulous IC valve, transverse ulcers, and scars or pseudopolyps<br><br>The scoring system from the above parameters could make the diagnoses correctly in 77 of 88 patients (87.5%).                                                                                                                                                                                                                        |
| Studies mainly focused on pathological findings |   |                                                                  |                                                                                                                                                                                                                                                                                                                                                                                                                                                                                                                                                  |                                                                                                                                                                                                                                                                                                                                                                                                                                |                                                                        |                                                                                                                                                                                                                                                                                                                                                                                                                                                                                                                                                                                                                                                                     |
| Pulimood AB,<br>1999(31)                        | R | 20 CD, 20 ITB were selected out of a total of 81 CD and 138 ITB  | On the basis of well-established clinical, endoscopic, radiological, and histological parameters.                                                                                                                                                                                                                                                                                                                                                                                                                                                | On the basis of well-established clinical, endoscopic, radiological, and histological parameters. Two cases were diagnosed by response to ATT                                                                                                                                                                                                                                                                                  | Christian Medical College, Vellore, Tamil Nadu, India<br><br>1986-1996 | The histological parameters characteristic of ITB were multiple (mean number of granulomas per section: 5.35), large (mean widest diameter: 193 µm), confluent granulomas often with caseating necrosis. Other features were ulcers lined by conglomerate epithelioid histiocytes and disproportionate submucosal inflammation.<br><br>The features characteristic of Crohn's disease were infrequent (mean number of granulomas per section: 0.75), small (mean widest diameter: 95 µm) granulomas, microgranulomas (defined as poorly organized collections of epithelioid histiocytes), focally enhanced colitis, and a high prevalence of chronic inflammation. |
| Pulimood AB,<br>2005(49)                        | R | 31 CD, 33 ITB (3 CD, 2 ITB were part of their earlier study(31)) | On the basis of a combination of clinical, radiological, endoscopic, and histological features. Required minimum 1 year follow up                                                                                                                                                                                                                                                                                                                                                                                                                | On the basis of a combination of clinical, radiological, endoscopic, and histological features. Dramatic response to ATT                                                                                                                                                                                                                                                                                                       | Christian Medical College, Vellore, Tamil Nadu, India<br><br>1996-2000 | The salient distinguishing features of TB were granulomas larger than 400 µm in maximum dimension, more than four sites of granulomatous inflammation per site, caseation, a band of epithelioid histiocytes in ulcer bases and location of granulomas in the caecum.<br><br>The salient features of CD were granulomas not showing any of the above features, focally enhanced colitis, pericryptal granulomatous inflammation, and the presence of architectural                                                                                                                                                                                                  |

|                             |   |                                           |                                                                                                                                                                                                                                                                                                                                                                                                                                                                         |                                                                                                                                                                                                                                                                                                                                                                                                           |                                                                                                          |                                                                                                                                                                                                                                                                                                                                                                                                                                                                                                                                                       |
|-----------------------------|---|-------------------------------------------|-------------------------------------------------------------------------------------------------------------------------------------------------------------------------------------------------------------------------------------------------------------------------------------------------------------------------------------------------------------------------------------------------------------------------------------------------------------------------|-----------------------------------------------------------------------------------------------------------------------------------------------------------------------------------------------------------------------------------------------------------------------------------------------------------------------------------------------------------------------------------------------------------|----------------------------------------------------------------------------------------------------------|-------------------------------------------------------------------------------------------------------------------------------------------------------------------------------------------------------------------------------------------------------------------------------------------------------------------------------------------------------------------------------------------------------------------------------------------------------------------------------------------------------------------------------------------------------|
|                             |   |                                           |                                                                                                                                                                                                                                                                                                                                                                                                                                                                         |                                                                                                                                                                                                                                                                                                                                                                                                           |                                                                                                          | alteration/activity/chronic inflammation/deep ulceration at sites that did not show granulomatous response in the same or adjacent segments.                                                                                                                                                                                                                                                                                                                                                                                                          |
| Kirsch R, 2006(45)          | R | 25 CD, 18 ITB<br><br>Consecutive patients | Based on established clinical, radiological, histological, and microbiological parameters.                                                                                                                                                                                                                                                                                                                                                                              | Based on (1)demonstration of AFB in histological sections(n = 12); (2) culture of MTB from colonic biopsy specimens (n = 2); (3) positive sputum culture and prompt response to ATT (n = 2); or (4) strong suspicion of TB on both clinical and histological grounds, together with a prompt response to ATT (n = 2).                                                                                     | Groote Schuur Hospital, Cape Town, South Africa<br><br>1984-2004                                         | Parameters helpful in diagnosis; Clinical parameter: chest radiographic features of TB (56% vs 0%), perianal fistulae (0% vs 40%) and extraintestinal manifestations of CD (0% vs 40%)<br>Pathological parameters differentiate ITB and CD: confluent granulomas, ≥10 granulomas per biopsy site and caseous necrosis.<br>Pathological features observed more in ITB: granulomas exceeding 0.05 mm <sup>2</sup> (67% v 8%), ulcers lined by conglomerate epithelioid histiocytes (61% v 8%) and disproportionate submucosal inflammation (67% v 10%). |
| Jin XJ, 2010(7)             | R | 42 CD, 55 ITB                             | At least two of the following criteria:<br>(1) clinical history of abdominal pain, malaise, diarrhea, and/or rectal bleeding;<br>(2) endoscopic findings of mucosal cobblestoning, linear ulceration, skip areas, or perianal disease;<br>(3) presence of enterocutaneous or entero-enteric fistulae and/or chronic perianal disease; and<br>(4) resolution of symptoms and morphological (endoscopic and histological) features after corticosteroid and 5-ASA therapy | At least two of the following criteria :<br>(1)demonstration of AFB on histologic examination of Ziehl-Neelsen stained sections;<br>(2) positive MTB culture;<br>(3) radiologic, colonoscopic, and/or operative evidence of ITB with proven tuberculosis elsewhere; and<br>(4) response to ATT without subsequent recurrence in patients with radiologic, colonoscopic, and/or operative evidence of ITB. | Inha University Hospital, Incheon, Korea<br><br>1996-2007                                                | The sensitivities and specificities of the TB-PCR test by kit <A>, kit <B>, and the in-house PCR method were 88.9% and 100%, 88.9% and 100%, and 66.7% and 100% in positive and negative controls, respectively<br><br>A combination of histologic findings and TB-PCR testing led to an increase of diagnostic sensitivity and the increase (from 47.3% to 58.2) was statistically significant with kit <B> (P = 0.000).                                                                                                                             |
| Studies mainly focus on PCR |   |                                           |                                                                                                                                                                                                                                                                                                                                                                                                                                                                         |                                                                                                                                                                                                                                                                                                                                                                                                           |                                                                                                          |                                                                                                                                                                                                                                                                                                                                                                                                                                                                                                                                                       |
| Amarapurkar DN, 2004(32)    | R | 20 CD, 60 ITB                             | Based on clinical, endoscopic and radiological parameters with exclusion of ITB, biopsy showing either non-specific inflammation or non-caseating granulomas with negative AFB smear or culture, evidence of extra-intestinal manifestations, good clinical response to steroids and failure of clinical improvement after ATT                                                                                                                                          | Any of the following criteria: Presence of AFB on histology or positive AFB culture, presence of caseating or non-caseating granulomas on biopsy, associated evidence of active TB at other sites which were confirmed on biopsy or on AFB culture along with a complete response in all patients to ATT                                                                                                  | Jagjivanram Western Railway Hospital and BYL Nair Ch Hospital and TN Medical College, Mumbai<br><br>2001 | Tissue PCR was positive in 21.6 % cases of ITB and 5 % CD.                                                                                                                                                                                                                                                                                                                                                                                                                                                                                            |
| Fei BY, 2014(8)             | P | 36 CD, 29 ITB                             | Based on well-established clinical, endoscopic, radiological, and histological parameters in accordance with the criteria in the literature                                                                                                                                                                                                                                                                                                                             | At least one of the following criteria was met:<br>1) histological evidence of a caseating granuloma,<br>2) histological demonstration of AFB,<br>3) intestinal granulomatous inflammation accompanied by                                                                                                                                                                                                 | Zhejiang Province People's Hospital, China<br><br>June 2010 - March 2013                                 | Fecal FQ-PCR for MTB was positive in 24 (82.8%) ITB patients and 3 (8.3%) CD patients.<br>Tissue PCR was positive for MTB in 16 (55.2%) ITB patients and 2 (5.6%) CD patients.<br><br>Compared with tissue FQ-PCR,                                                                                                                                                                                                                                                                                                                                    |



|                                           |   |                                                                      |                                                                                                                                                                                                                                                                                                                                                                                                                                                                                                                                                                                         |                                                                                                                                                                                                                                                                                                                                                                                                                                                                                                                                                                        |                                                                   |                                                                                                                                                                                                                                                                                                                                                                                                                                                                                                                      |
|-------------------------------------------|---|----------------------------------------------------------------------|-----------------------------------------------------------------------------------------------------------------------------------------------------------------------------------------------------------------------------------------------------------------------------------------------------------------------------------------------------------------------------------------------------------------------------------------------------------------------------------------------------------------------------------------------------------------------------------------|------------------------------------------------------------------------------------------------------------------------------------------------------------------------------------------------------------------------------------------------------------------------------------------------------------------------------------------------------------------------------------------------------------------------------------------------------------------------------------------------------------------------------------------------------------------------|-------------------------------------------------------------------|----------------------------------------------------------------------------------------------------------------------------------------------------------------------------------------------------------------------------------------------------------------------------------------------------------------------------------------------------------------------------------------------------------------------------------------------------------------------------------------------------------------------|
|                                           |   |                                                                      |                                                                                                                                                                                                                                                                                                                                                                                                                                                                                                                                                                                         | histologically or microbiologically confirmed extraintestinal TB, and 4) a positive MTB culture.<br><br>Response to 2-3 months of ATT in uncertain cases                                                                                                                                                                                                                                                                                                                                                                                                               |                                                                   | fecal FQ-PCR was more sensitive (P=0.02).                                                                                                                                                                                                                                                                                                                                                                                                                                                                            |
| Studies mainly focused on CT enterography |   |                                                                      |                                                                                                                                                                                                                                                                                                                                                                                                                                                                                                                                                                                         |                                                                                                                                                                                                                                                                                                                                                                                                                                                                                                                                                                        |                                                                   |                                                                                                                                                                                                                                                                                                                                                                                                                                                                                                                      |
| Park YH, 2013(44)                         | R | 64 CD, 17 ITB                                                        | 2 of the following criteria of the Japanese diagnostic criteria were met:<br>(1) clinical history of abdominal pain, weight loss, malaise, diarrhea, and/or rectal bleeding;<br>(2) endoscopic findings of mucosal cobblestone, linear ulceration, skip areas, or perianal disease;<br>(3) radiologic findings of stricture, fistula, mucosal cobblestone, or ulceration;<br>(4) macroscopic appearance of bowel wall induration, mesenteric lymphadenopathy, and "creeping fat" on laparotomy; and<br>(5) pathologic findings of transmural inflammation and/or epithelioid granulomas | one of the following criteria:<br>(1) caseating granuloma on the histologic examination,<br>(2) histologic demonstration of AFB,<br>(3) isolation of MTB on tissue culture, and<br>(4) tuberculosis PCR.                                                                                                                                                                                                                                                                                                                                                               | Seerance Hospital, Yonsei, Seoul, Korea<br><br>Jan2006-Aug2011    | On univariate analysis, segmental involvement, comb sign, fibrofatty changes, moderate wall thickening, and asymmetric distribution were significant predictors for CD.                                                                                                                                                                                                                                                                                                                                              |
| Zhao HS, 2014(15)                         | R | 141 CD, 47 ITB<br><br>Inpatients                                     | Based on the clinical, radiographic, colonoscopic, and histological features and accorded with the WHO criteria                                                                                                                                                                                                                                                                                                                                                                                                                                                                         | 1 of the following criteria:<br>(1) presence of caseating granuloma on histology of diseased tissue (intestine, peritoneum, or lymph nodes) or noncaseating well-formed granuloma(s) consisting of Langhan's giant cell with epithelioid cells with a peripheral cuff of lymphocytes;<br>(2) presence of AFB on smear or on histological section;<br>(3) positive culture for AFB;<br>(4) associated active pulmonary TB; or by the absence of other disease on histological examination of the biopsy obtained from the colonic lesions, along with a successful ATT. | Ruijin Hospital, Shanghai, China<br><br>Jan 2008-March 2013       | On univariate analysis, CT findings indicative of CD were involvement of the left colon, asymmetric pattern of involvement and abscess, comb sign.<br><br>CT findings indicative of ITB were the distribution of the lymph nodes along the right colic artery, contracture of ileocecal valve, fixed patulous ileocecal valve and lymph nodes with central necrosis                                                                                                                                                  |
| Kedia S, 2015(14)                         | R | 54 CD, 50 ITB<br><br>Only patients who underwent CT before treatment | On the basis of the European Crohn's and Colitis Organization guidelines, with a combination of clinical, endoscopic and histological features<br><br>failed to response to ATT and subsequently response to oral steroids/CD specific therapy in indeterminate cases                                                                                                                                                                                                                                                                                                                   | An appropriate clinical setting with the demonstration of necrotizing granulomas on histopathology or demonstration of AFB on histopathology or culture of intestinal tissue<br><br>response to ATT in indeterminate cases                                                                                                                                                                                                                                                                                                                                             | All India Institute of Medical Sciences<br><br>Aug 2008-July 2011 | On multivariate analysis, ileocecal involvement, long-segment involvement and the presence of lymph node $\geq 1$ cm were statistically significant. Based upon these variables, a risk score (with values ranging from 0 to 3) was generated,<br><ul style="list-style-type: none"> <li>• scores 0 and 1 having specificity of 100 % and 87 %, respectively, and PPV of 100 % and 76 %, respectively, for ITB</li> <li>• scores 2 and 3 having specificity of 68 % and 90 %, respectively, and PPV of 63</li> </ul> |

|                                                                     |   |                                                                                                                                                                                                                                                                                                                                                                                                                                                                                                                                                    |                                                                                                                                                                                                                                                                                                                                                                                                                                                                                                                                                                                           |                                                                                                                                                                                                                                                                                                                                                                                                                              |                                                                                                                                                                                                                                                                  |                                                                                                                                                                                                                                                                                                    |
|---------------------------------------------------------------------|---|----------------------------------------------------------------------------------------------------------------------------------------------------------------------------------------------------------------------------------------------------------------------------------------------------------------------------------------------------------------------------------------------------------------------------------------------------------------------------------------------------------------------------------------------------|-------------------------------------------------------------------------------------------------------------------------------------------------------------------------------------------------------------------------------------------------------------------------------------------------------------------------------------------------------------------------------------------------------------------------------------------------------------------------------------------------------------------------------------------------------------------------------------------|------------------------------------------------------------------------------------------------------------------------------------------------------------------------------------------------------------------------------------------------------------------------------------------------------------------------------------------------------------------------------------------------------------------------------|------------------------------------------------------------------------------------------------------------------------------------------------------------------------------------------------------------------------------------------------------------------|----------------------------------------------------------------------------------------------------------------------------------------------------------------------------------------------------------------------------------------------------------------------------------------------------|
|                                                                     |   |                                                                                                                                                                                                                                                                                                                                                                                                                                                                                                                                                    |                                                                                                                                                                                                                                                                                                                                                                                                                                                                                                                                                                                           |                                                                                                                                                                                                                                                                                                                                                                                                                              |                                                                                                                                                                                                                                                                  | % and 80 %, respectively, for CD                                                                                                                                                                                                                                                                   |
| Mao R, 2015(16)                                                     | P | 67 CD, 38 ITB<br><br>Consecutive patients<br><br>Inclusion criteria<br>(i) presence of subjective symptoms, including abdominal pain and/or diarrhea;<br>(ii) definite lesions suspected on colonoscopy to be ITB or CD;<br>(iii) the patient was not receiving ATT;<br>(iv) the patient had not received biological therapy or immunosuppressive agents within the previous year<br>Exclusion criteria<br>(i) history of intestinal resection;<br>(ii) diagnosis was uncertain or was changed from CD or ITB to another disease during follow-up. | At least two of the following criteria:<br>(a) clinical history of abdominal pain, weight loss, malaise, diarrhea, and/or rectal bleeding;<br>(b) endoscopic findings of mucosal cobblestoning, linear ulceration, skip areas, or perianal disease;<br>(c) radiologic findings of stricture, fistula, mucosal cobblestoning, or ulceration;<br>(d) macroscopic appearance of bowel-wall induration, mesenteric lymphadenopathy, and "creeping fat" at laparotomy; and<br>(e) pathologic findings of transmural inflammation and/or epithelioid granulomas + response to Crohn's treatment | At least one of the following criteria:<br>(a) caseating granuloma on histological investigation;<br>(b) demonstration of AFB on histological investigation;<br>(c) MTB found on tissue culture; or<br>(d) clinical and endoscopic response after 6 months of ATT without subsequent recurrence                                                                                                                              | The First Affiliated Hospital of Sun Yat-sen University, Guangzhou, China<br><br>The First Affiliated Hospital of Nanchang University, Nanchang, China<br><br>The Second Xiangya Hospital of Central South University, Changsha, China<br><br>June 2011- Dec2013 | On multivariate analysis, segmental small bowel involvement (OR 0.104, 95%CI 0.022-0.50), and comb sign (OR 0.02, 95%CI 0.003-0.26) were independent factors of Crohn's.<br><br>Combining CTE and colonoscopic findings increased the accuracy of diagnosing either CD or ITB from 66.7% to 95.2%. |
| Studies mainly focused on interferon-gamma releasing assay and ASCA |   |                                                                                                                                                                                                                                                                                                                                                                                                                                                                                                                                                    |                                                                                                                                                                                                                                                                                                                                                                                                                                                                                                                                                                                           |                                                                                                                                                                                                                                                                                                                                                                                                                              |                                                                                                                                                                                                                                                                  |                                                                                                                                                                                                                                                                                                    |
| Makharia GK, 2007(56)                                               | P | 59 CD, 30 ITB, 25 UC, 21 healthy subjects                                                                                                                                                                                                                                                                                                                                                                                                                                                                                                          | On the basis of the presence of characteristic clinical manifestations (chronic diarrhea, hematochezia, abdominal pain, and intestinal obstructive manifestations), endoscopic features (skip lesions, asymmetrical involvement, deep ulcers, aphthous ulcers, ileocecal valve involvement, and terminal ileal involvement), and histological evidence (acute or chronic colitis, presence of inflammation extending beyond muscularis mucosae, lymphoid follicles, and noncaseating granuloma)                                                                                           | On the basis of characteristic clinical features (abdominal pain, constipation and/or diarrhea, constitutional symptoms, intestinal obstruction), endoscopic features (ileocecal area involvement, ulcerations, nodularity, and strictures), histological features (presence of caseating granuloma), microbiological test (presence of AFB on the smear examination or demonstration of AFB by PCR), and/or response to ATT | All India Institute of Medical Sciences, New Delhi, India<br><br>(not mention to year of recruitment)                                                                                                                                                            | There was no significant difference in ASCA IgA (33.9% vs. 43.3%), ASCA IgG (50.86% vs. 46.6%), or ANCA (10.7%, 7.4%) in patients with CD and IT, respectively.                                                                                                                                    |
| Ghoshal U, 2007(55)                                                 | P | 16 CD, 16 ITB, 38 controls (35 UC, 11 healthy subjects, 1 colonic carcinoma)<br><br>Prospective case-control study                                                                                                                                                                                                                                                                                                                                                                                                                                 | Based on endoscopic, radiological, histological parameters and findings at laparotomy in some patients                                                                                                                                                                                                                                                                                                                                                                                                                                                                                    | Demonstration of AFB either in intestinal biopsy or another site with or without granuloma at histology and response to treatment with ATT.                                                                                                                                                                                                                                                                                  | Sanjay Gandhi Postgraduate Institute of Medical Sciences, Lucknow, India<br><br>Jan 2001 - Dec 2003                                                                                                                                                              | 50% of ITB, 62% of CD, 26% of UC, and 8.3% of non-IBD control subjects tested positive for ASCA in serum.<br>The positive rate in ITB and CD were not statistically different.                                                                                                                     |
| Lee JN, 2010(47)                                                    | R | 60 patients (44 CD, 12 ITB, 2 Behcet's)                                                                                                                                                                                                                                                                                                                                                                                                                                                                                                            | Clinical manifestation, endoscopic findings, and pathological findings, with an exclusion of ITB, and response to treatment                                                                                                                                                                                                                                                                                                                                                                                                                                                               | Any of the following:<br>(1) presence of AFB in histological section;<br>(2) positive culture for AFB;<br>(3) presence of caseous                                                                                                                                                                                                                                                                                            | Pusan National University Hospital, Korea                                                                                                                                                                                                                        | The sensitivity, specificity, PPV, and NPV of T-SPOT.TB for diagnosis of ITB were 100%, 83.3%, 60.0%, and 100%                                                                                                                                                                                     |

|                  |   |                                                                                                                                                                                                                                   |                                                                                                                                                                                                                                                                                                                                                                                                                                                                                                                                                                                                                                                                                                                                                                                                                                                                                                                                                                                                     |                                                                                                                                                                                                                                                                                                                                                                                      |                                                                        |                                                                                                                                                                                                                                                                                                                |
|------------------|---|-----------------------------------------------------------------------------------------------------------------------------------------------------------------------------------------------------------------------------------|-----------------------------------------------------------------------------------------------------------------------------------------------------------------------------------------------------------------------------------------------------------------------------------------------------------------------------------------------------------------------------------------------------------------------------------------------------------------------------------------------------------------------------------------------------------------------------------------------------------------------------------------------------------------------------------------------------------------------------------------------------------------------------------------------------------------------------------------------------------------------------------------------------------------------------------------------------------------------------------------------------|--------------------------------------------------------------------------------------------------------------------------------------------------------------------------------------------------------------------------------------------------------------------------------------------------------------------------------------------------------------------------------------|------------------------------------------------------------------------|----------------------------------------------------------------------------------------------------------------------------------------------------------------------------------------------------------------------------------------------------------------------------------------------------------------|
|                  |   | disease)<br><br>(potentially duplicated data with the study by Beak et al. However, in Beak, only IGRA results were presented. We included only the clinical manifestation and endoscopic findings of this study in our analyses) | for CD                                                                                                                                                                                                                                                                                                                                                                                                                                                                                                                                                                                                                                                                                                                                                                                                                                                                                                                                                                                              | granuloma in histological section; (4) responded to ATT in clinical suspicious cases. The response was confirmed by follow up colonoscopy at 2-3 months.                                                                                                                                                                                                                             | January 2007 to January 2009                                           | respectively.                                                                                                                                                                                                                                                                                                  |
| Kim YS, 2011(38) | P | 72 CD, 75 ITB, 20 healthy controls                                                                                                                                                                                                | The Japanese diagnostic criteria                                                                                                                                                                                                                                                                                                                                                                                                                                                                                                                                                                                                                                                                                                                                                                                                                                                                                                                                                                    | At least one of the following criteria:<br>a) histologic evidence of caseating granulomas;<br>b) histologic demonstration of AFB;<br>c) growth of MTB on tissue culture.<br><br>Response to ATT in 2-3 months in uncertain cases                                                                                                                                                     | 13 hospitals in Korea<br><br>June 2007- Nov2008                        | ASCA positive in 44% of CD, 13.3% of ITB, and 15% of healthy control (p<0.01)<br><br>IGRA positive in 9.7% of CD, 66.6% of ITB (p<0.01)<br><br>In cases which ASCA positive/QFT negative, the sensitivity, specificity, PPV, and NPV for the diagnosis of CD were 44.4%, 96.0%, 91.4%, and 64.3%, respectively |
| Li Y, 2012(2)    | P | 65 CD, 19 ITB                                                                                                                                                                                                                     | Presence of at least 3 different histologic features; or presence of non-caseating granulomas on histology with at least one other feature; or resolution of symptoms and morphologic (endoscopic and radiographic) features after 3 to 12 months' treatment of corticosteroid and 5-ASA preparations or anti-TNF $\alpha$ biologics.<br><br>Histological features included;<br>(1) normal mucus content in the goblet cells of the inflamed region;<br>(2) lymphocyte aggregation in the mucosa and submucosa;<br>(3) non-caseating granulomas;<br>(4) longitudinal ulcers/fissures; and<br>(5) transmural inflammation or inflammation beyond mucosa<br><br>Morphological features included<br>(1) discontinuous/segmental and asymmetrical mucosal involvement;<br>(2) deep mucosal longitudinal fissures/ulcers;<br>(3) transmural inflammation;<br>(4) rigid and strictured intestinal wall; and<br>(5) presence of enterocutaneous or entero-enteric fistula and/or chronic perianal disease. | Any of the followings;<br>(1) demonstration of AFB on histological examination of Ziehl-Neelsen stained sections;<br>(2) positive MTB culture;<br>(3) radiological, colonoscopic, and/or operative evidence of ITB with proven TB elsewhere; and<br>(4) response to ATT without subsequent recurrence in patients with radiological, colonoscopic, and/or operative evidence of ITB. | Peking Union Medical College Hospital, China<br><br>June 2008- Feb2010 | On multivariate analysis, T-SPOT.TB (Hazard ratio 7.0, 95% CI 1.9–25.7) was found to be a good predictor for ITB diagnosis. The sensitivity, specificity, PPV, and NPV of T-SPOT.TB were 84.2%, 75.4%, 50.0%, and 94.2%, respectively                                                                          |
| Lei Y,           | R | 103 CD, 88                                                                                                                                                                                                                        | According to the WHO diagnostic criteria                                                                                                                                                                                                                                                                                                                                                                                                                                                                                                                                                                                                                                                                                                                                                                                                                                                                                                                                                            | According to the following criteria: (i)                                                                                                                                                                                                                                                                                                                                             | IBD center of                                                          | Abnormal pulmonary X-ray,                                                                                                                                                                                                                                                                                      |

|                                  |        |                                                       |                                                                                                                 |                                                                                                                                                                                                                                                                    |                                                                                                  |                                                                                                                                                                                                                                                                                                                                                                                 |
|----------------------------------|--------|-------------------------------------------------------|-----------------------------------------------------------------------------------------------------------------|--------------------------------------------------------------------------------------------------------------------------------------------------------------------------------------------------------------------------------------------------------------------|--------------------------------------------------------------------------------------------------|---------------------------------------------------------------------------------------------------------------------------------------------------------------------------------------------------------------------------------------------------------------------------------------------------------------------------------------------------------------------------------|
| 2013(3)                          |        | ITB                                                   |                                                                                                                 | identification of MTB by acid-fast staining or culture in biopsied specimens;<br>(ii) presence of caseating granulomas in histological examination or<br>(iii) improvement of clinical and endoscopic disease activity after at least 3 months of anti-TB therapy. | Zhongnan Hospital<br><br>2003-2011                                                               | ascites and lesions of both cecum and ascending colon were more associated with ITB, while intestinal surgery and lesions of both ileum and adjacent colon were more commonly seen in CD. Significant diagnostic concordance was found using T-SPOT.TB ( $k = 0.786$ ) by consistency test. The sensitivity, specificity, PPV and NPV were 86%, 93%, 88% and 91%, respectively. |
| Moon G, 2009(50)                 | N<br>A | 41 CD, 30 ITB, 30 volunteers                          | The presence of a granuloma in the histologic finding, by typical endoscopic findings, and by clinical symptoms | Either by the presence of a caseous granuloma in the histologic findings or by a clinical and endoscopic response to ATT for 3 months                                                                                                                              | Hanam Song Do Hospital, Song Do Colorectal Hospital, Korea<br><br>June 2006-<br>June 2008        | Positive QFT-G test results were found in 27 ITB (90%), 6 CD (14.6%), and 2 normal volunteers (6.7%). Significant difference was noted between the ITB and the CD patients ( $p < 0.05$ ).                                                                                                                                                                                      |
| Baek DH, 2013(51)                | N<br>A | 59 CD, 31 ITB                                         | No data                                                                                                         | No data                                                                                                                                                                                                                                                            | Pusan National University College of Medicine, Busan, Korea<br><br>January 2007-<br>January 2011 | The sensitivity and specificity, PPV, and NPV of T-SPOT.TB blood test for ITB were 100%, 78.1%, 68.9%, and 100%, respectively                                                                                                                                                                                                                                                   |
| Kim SK, 2013(54)                 | N<br>A | Overall 75, 11 CD, 22 ITB                             | No data                                                                                                         | No data                                                                                                                                                                                                                                                            | Kyungpook National University, Daegu, South Korea<br><br>October 2007-<br>December 2011          | The sensitivity, specificity, PPV, and NPV of QuantiFERON-TB Gold In-Tube test for ITB were 54.2%, 64.2%, 56.5%, and 79.1%, respectively.                                                                                                                                                                                                                                       |
| He Y, 2014(52)                   | N<br>A | 108 CD, 40 ITB                                        | No data                                                                                                         | No data                                                                                                                                                                                                                                                            | First Affiliated Hospital, SunYat-Sen University, China                                          | The sensitivity and specificity, PPV, and NPV of T-SPOT.TB blood test for ITB were 95.0%, 85.4%, 67.8%, and 98.1%, respectively                                                                                                                                                                                                                                                 |
| Kakkadasam Ramaswami P, 2014(53) | P      | 53 colonic ulcers (35 CD, 18 ITB), 30 normal subjects | No data                                                                                                         | No data                                                                                                                                                                                                                                                            | Medical Trust Hospital, Ernakulam, India                                                         | The sensitivity, specificity, PPV, and NPV of QuantiFERON-TB Gold test for ITB were 94.4%, 85.7%, 77.2%, and 96.7%, respectively                                                                                                                                                                                                                                                |

R, retrospective; P, prospective; NA, no data available; CD Crohn's disease; ITB intestinal tuberculosis; MTB *Mycobacterium tuberculosis*; AFB acid fast bacilli; ATT anti-tuberculous therapy; PPV positive predicted value; NPV negative predicted value; OR odds ratio; CI confidence interval; ROC Receiver-operating characteristic; WHO World Health Organization; PCR polymerase chain reaction; CTE CT enterography; ASCA Anti-*Saccharomyces cerevisiae* antibody; IGRA interferon-gamma releasing assay

**Table S3.** Evaluation of study bias using QUADAS-2 tool

| Author, year                                    | Risk of bias      |            |                    |                 |
|-------------------------------------------------|-------------------|------------|--------------------|-----------------|
|                                                 | Patient Selection | Index Test | Reference Standard | Flow and Timing |
| Liu TH, 1981(28)                                | High              | Low        | Low                | Unclear         |
| Zhou ZY, 2006(46)                               | Low               | Low        | High               | Unclear         |
| Amarapurkar DN, 2008(33)                        | High              | Low        | Low                | Low             |
| Gu Q, 2009(35)                                  | Low               | Low        | Low                | Unclear         |
| Makharia GK, 2010(6)                            | High              | Low        | Low                | Low             |
| Pulimood AB, 2011(29)                           | Unclear           | Low        | Low                | Low             |
| Dutta AK, 2011(1)                               | Low               | Low        | Low                | Low             |
| Li X, 2011(11)                                  | Low               | Unclear    | Low                | Low             |
| Yu H, 2012(12)                                  | Low               | Low        | Low                | Low             |
| Hatemi I, 2012(37)                              | High              | Low        | Unclear            | Low             |
| Cheng L, 2013(34)                               | Low               | Low        | Low                | Low             |
| Liu YY, 2014(30)                                | low               | Low        | Low                | Unclear         |
| Larsson G, 2014(13)                             | Low               | Low        | Low                | Low             |
| Haung X, 2015(17)                               | Low               | Low        | Low                | Low             |
| Singh B, 2015(48)                               | Low               | Low        | Low                | Low             |
| Studies mainly focused on inflammatory markers  |                   |            |                    |                 |
| Liu S, 2013(36)                                 | High              | Low        | Low                | Low             |
| Studies mainly focused on colonoscopic findings |                   |            |                    |                 |
| Lee YJ, 2006(10)                                | Low               | Low        | Low                | Low             |
| Studies mainly focused on pathologic findings   |                   |            |                    |                 |
| Pulimood AB, 1999(31)                           | High              | Low        | Unclear            | Low             |
| Pulimood AB,                                    | High              | Low        | Low                | Low             |

|                                                                     |         |     |         |         |
|---------------------------------------------------------------------|---------|-----|---------|---------|
| 2005(49)                                                            |         |     |         |         |
| Kirsch R, 2006(45)                                                  | Low     | Low | Low     | Unclear |
| Jin XJ, 2010(7)                                                     | Low     | Low | Low     | Low     |
| Studies focused on polymerase chain reaction results                |         |     |         |         |
| Amarapurkar DN, 2004(32)                                            | Unclear | Low | Low     | Unclear |
| Fei BY, 2014(8)                                                     | Low     | Low | Low     | Low     |
| Studies mainly focused on computed tomography enterography findings |         |     |         |         |
| Park YH, 2013(44)                                                   | Low     | Low | Low     | Low     |
| Zhao HS, 2014(15)                                                   | Low     | Low | Low     | Low     |
| Kedia S, 2015(14)                                                   | High    | Low | Low     | Low     |
| Mao R, 2015(16)                                                     | Low     | Low | Low     | Low     |
| Studies mainly focused on interferon-gamma releasing assay and ASCA |         |     |         |         |
| Makharia GK, 2007(56)                                               | Unclear | Low | Low     | Unclear |
| Ghoshal U, 2007(55)                                                 | High    | Low | Low     | Low     |
| Lee JN, 2010(47)                                                    | Low     | Low | Low     | Low     |
| Kim YS, 2011(38)                                                    | Low     | Low | Low     | High    |
| Li Y, 2012(2)                                                       | Low     | Low | Low     | Low     |
| Lei Y, 2013(3)                                                      | Low     | Low | Low     | Low     |
| Moon G, 2009(50)                                                    | Unclear | Low | Unclear | Low     |
| Baek DH, 2013(51)                                                   | Unclear | Low | Unclear | Low     |
| Kim SK, 2013(54)                                                    | Unclear | Low | Unclear | Low     |
| He Y, 2014(52)                                                      | Unclear | Low | Unclear | Low     |
| Kakkadasam<br>Ramaswami P,<br>2014(53)                              | Unclear | Low | Unclear | Low     |



**Table S4** Sensitivity analyses selecting for the studies with low bias

| Findings                                                    | No. of studies                                     | Positive in CD (%)              | Positive in ITB (%)             | Odds ratio for CD | 95% CI             | I <sup>2</sup> (%) | +LR for CD  | - LR for CD | +LR for ITB | - LR for ITB |
|-------------------------------------------------------------|----------------------------------------------------|---------------------------------|---------------------------------|-------------------|--------------------|--------------------|-------------|-------------|-------------|--------------|
| Demographic data                                            |                                                    |                                 |                                 |                   |                    |                    |             |             |             |              |
| <b>Male gender</b><br>(1-3, 8, 10, 12, 13, 15-17, 34, 44)   | <b>12</b>                                          | <b>513/772</b><br><b>(66.5)</b> | <b>255/502</b><br><b>(50.8)</b> | <b>1.89</b>       | <b>1.49 – 2.40</b> | <b>0</b>           | <b>1.31</b> | <b>0.68</b> | <b>0.76</b> | <b>1.47</b>  |
| Clinical manifestations                                     |                                                    |                                 |                                 |                   |                    |                    |             |             |             |              |
| Abdominal pain<br>(1-3, 8, 12, 13, 15, 34, 47)              | 9*                                                 | 537/616<br>(87.2)               | 315/375<br>(84.0)               | 1.22              | 0.84–1.78          | 0                  |             |             |             |              |
| Diarrhea<br>(1-3, 8, 12, 13, 15, 34, 47)                    | 9*                                                 | 378/615<br>(61.4)               | 189/370<br>(51.1)               | 1.48              | 0.96–2.28          | 56.8               |             |             |             |              |
| <b>Hematochezia</b><br>(1-3, 8, 12, 15, 34)                 | <b>7</b>                                           | <b>180/535</b><br><b>(33.6)</b> | <b>63/325</b><br><b>(19.4)</b>  | <b>1.55</b>       | <b>1.20–2.01</b>   | <b>0</b>           | <b>1.74</b> | <b>0.82</b> | <b>0.58</b> | <b>1.21</b>  |
| <b>Perianal disease</b><br>(1, 8, 12, 15, 34, 47)           | <b>6</b>                                           | <b>99/411</b><br><b>(24.1)</b>  | <b>10/230</b><br><b>(4.3)</b>   | <b>5.00</b>       | <b>2.52–9.94</b>   | <b>0</b>           | <b>5.54</b> | <b>0.79</b> | <b>0.18</b> | <b>1.26</b>  |
| <b>Obstruction</b><br>(2, 3, 12, 15, 34, 47)                | <b>6</b>                                           | <b>91/513</b><br><b>(17.7)</b>  | <b>24/278</b><br><b>(8.6)</b>   | <b>2.31</b>       | <b>1.42–3.76</b>   | <b>0</b>           | <b>2.05</b> | <b>0.90</b> | <b>0.49</b> | <b>1.11</b>  |
| Abdominal mass<br>(1-3, 12, 34)                             | 5                                                  | 41/358<br>(11.4)                | 16/249<br>(6.4)                 | 1.45              | 0.76–2.76          | 0                  |             |             |             |              |
| <b>Fever</b><br>(1-3, 8, 12, 13, 15, 34, 47)                | <b>9</b>                                           | <b>192/615</b><br><b>(31.1)</b> | <b>165/374</b><br><b>(44.1)</b> | <b>0.53</b>       | <b>0.40–0.71</b>   | <b>0</b>           | <b>0.70</b> | <b>1.23</b> | <b>1.41</b> | <b>0.81</b>  |
| Weight loss<br>(1, 3, 12, 13, 15, 34)                       | 6                                                  | 317/471<br>(67.3)               | 209/314<br>(66.6)               | 0.87              | 0.38–2.00          | 84.0               |             |             |             |              |
| <b>Night sweat</b><br>(2, 8, 12, 15, 34)                    | <b>5</b>                                           | <b>38/402</b><br><b>(9.5)</b>   | <b>85/207</b><br><b>(41.1)</b>  | <b>0.16</b>       | <b>0.09–0.26</b>   | <b>12.3</b>        | <b>0.23</b> | <b>1.54</b> | <b>4.34</b> | <b>0.65</b>  |
| Anemia                                                      | Not done due to limited number of low-bias studies |                                 |                                 |                   |                    |                    |             |             |             |              |
| <b>Lung involvement</b><br>(2, 3, 12, 15, 34)               | <b>5</b>                                           | <b>36/467</b><br><b>(7.7)</b>   | <b>108/264</b><br><b>(40.9)</b> | <b>0.14</b>       | <b>0.07–0.26</b>   | <b>40.9</b>        | <b>0.19</b> | <b>1.56</b> | <b>5.31</b> | <b>0.64</b>  |
| <b>Ascites</b><br>(2, 3, 8, 12, 15, 44, 47)                 | <b>7</b>                                           | <b>26/496</b><br><b>(5.2)</b>   | <b>55/245</b><br><b>(22.4)</b>  | <b>0.17</b>       | <b>0.07–0.38</b>   | <b>34.0</b>        | <b>0.23</b> | <b>1.22</b> | <b>4.28</b> | <b>0.82</b>  |
| <b>Extraintestinal manifestations</b><br>(1, 3, 15, 34, 48) | <b>5</b>                                           | <b>180/684</b><br><b>(26.3)</b> | <b>43/437</b><br><b>(9.8)</b>   | <b>3.74</b>       | <b>2.60–5.40</b>   | <b>0</b>           | <b>2.67</b> | <b>0.82</b> | <b>0.37</b> | <b>1.22</b>  |
| Endoscopic findings                                         |                                                    |                                 |                                 |                   |                    |                    |             |             |             |              |
| <b>Longitudinal ulcers</b><br>(1, 2, 8, 10, 12, 16, 34, 47) | <b>8</b>                                           | <b>195/446</b><br><b>(43.7)</b> | <b>19/278</b><br><b>(6.8)</b>   | <b>9.13</b>       | <b>5.32–15.68</b>  | <b>3.7</b>         | <b>6.39</b> | <b>0.60</b> | <b>0.16</b> | <b>1.65</b>  |
| <b>Transverse ulcers</b><br>(1, 2, 8, 10, 12, 16, 34, 47)   | <b>8</b>                                           | <b>77/446</b><br><b>(17.3)</b>  | <b>148/278</b><br><b>(53.2)</b> | <b>0.15</b>       | <b>0.10–0.22</b>   | <b>0</b>           | <b>0.32</b> | <b>1.77</b> | <b>3.08</b> | <b>0.57</b>  |

|                                                            |                                                    |                                 |                                 |              |                               |      |              |             |             |             |
|------------------------------------------------------------|----------------------------------------------------|---------------------------------|---------------------------------|--------------|-------------------------------|------|--------------|-------------|-------------|-------------|
| <b>Aphthous lesions</b><br>(1, 8, 10, 12, 13, 16, 34)      | <b>7</b>                                           | <b>119/374</b><br><b>(31.8)</b> | <b>42/278</b><br><b>(15.1)</b>  | <b>3.12</b>  | <b>1.40–</b><br><b>6.98</b>   | 68.3 | 2.11         | 0.80        | 0.47        | 1.24        |
| <b>Cobblestone appearance</b><br>(1, 2, 8, 10, 12, 16, 34) | <b>7</b>                                           | <b>108/402</b><br><b>(26.8)</b> | <b>20/266</b><br><b>(7.5)</b>   | <b>3.76</b>  | <b>2.06–</b><br><b>6.85</b>   | 15.5 | <b>3.57</b>  | <b>0.79</b> | <b>0.28</b> | <b>1.26</b> |
| <b>Patulous ileocecal valve</b><br>(1, 10, 12, 16, 34)     | <b>5</b>                                           | <b>29/297</b><br><b>(9.8)</b>   | <b>64/210</b><br><b>(30.4)</b>  | <b>0.21</b>  | <b>0.09–</b><br><b>0.48</b>   | 43.3 | <b>0.32</b>  | <b>1.30</b> | <b>3.12</b> | <b>0.77</b> |
| Pseudopolyps<br>(1, 2, 8, 10, 12, 16, 47)                  | 7                                                  | 131/339<br>(38.6)               | 73/209<br>(34.9)                | 1.33         | 0.57–<br>3.10                 | 75.3 |              |             |             |             |
| Stricture<br>(1, 2, 8, 10, 47)                             | 5                                                  | 70/219<br>(31.9)                | 26/128<br>(20.3)                | 1.58         | 0.91–<br>2.72                 | 0    |              |             |             |             |
| Mucosal bridging                                           | Not done due to limited number of low-bias studies |                                 |                                 |              |                               |      |              |             |             |             |
| Skipped lesions                                            | Not done due to limited number of low-bias studies |                                 |                                 |              |                               |      |              |             |             |             |
| Nodularity                                                 | Not done due to limited number of low-bias studies |                                 |                                 |              |                               |      |              |             |             |             |
| Location of involvement by colonoscopy                     |                                                    |                                 |                                 |              |                               |      |              |             |             |             |
| Not done due to limited number of low-bias studies         |                                                    |                                 |                                 |              |                               |      |              |             |             |             |
| Pathologic findings                                        |                                                    |                                 |                                 |              |                               |      |              |             |             |             |
| <b>Granuloma</b><br>(7, 8, 10, 12, 13, 17, 47)             | <b>7</b>                                           | <b>88/263</b><br><b>(33.4)</b>  | <b>158/240</b><br><b>(65.8)</b> | <b>0.25</b>  | <b>0.13–</b><br><b>0.50</b>   | 54.3 | 0.51         | 1.95        | 1.97        | 0.51        |
| Other pathologic findings                                  | Not done due to limited number of low-bias studies |                                 |                                 |              |                               |      |              |             |             |             |
| Computed tomography enterography findings                  |                                                    |                                 |                                 |              |                               |      |              |             |             |             |
| Short segment                                              | Not done due to limited number of low-bias studies |                                 |                                 |              |                               |      |              |             |             |             |
| Wall stratification                                        | Not done due to limited number of low-bias studies |                                 |                                 |              |                               |      |              |             |             |             |
| <b>Asymmetrical wall thickening</b><br>(15, 16, 44)        | <b>3</b>                                           | <b>133/262</b><br><b>(50.7)</b> | <b>3/96 (3.1)</b>               | <b>26.74</b> | <b>8.68–</b><br><b>82.42</b>  | 0    | <b>16.24</b> | <b>0.51</b> | <b>0.06</b> | <b>1.97</b> |
| <b>Comb sign</b><br>(15, 16, 44)                           | <b>3</b>                                           | <b>228/262</b><br><b>(87.0)</b> | <b>18/96</b><br><b>(18.7)</b>   | <b>43.69</b> | <b>20.82–</b><br><b>91.69</b> | 0    | <b>4.64</b>  | <b>0.16</b> | <b>0.22</b> | <b>6.26</b> |
| <b>Fibrofatty proliferation</b><br>(15, 16, 44)            | <b>3</b>                                           | <b>118/262</b><br><b>(45.0)</b> | <b>12/96</b><br><b>(12.5)</b>   | <b>5.35</b>  | <b>2.58–</b><br><b>11.10</b>  | 7.5  | <b>3.60</b>  | <b>0.63</b> | <b>0.28</b> | <b>1.59</b> |
| Serology                                                   |                                                    |                                 |                                 |              |                               |      |              |             |             |             |
| <b>Positive IGRA</b><br>(2, 3, 17)                         | <b>3</b>                                           | <b>21/157</b><br><b>(13.4)</b>  | <b>90/101</b><br><b>(89.1)</b>  | <b>0.01</b>  | <b>0.00–</b><br><b>0.09</b>   | 71.4 | 0.15         | 7.95        | 6.66        | 0.12        |
| Positive ASCA                                              | Not done due to limited number of low-bias studies |                                 |                                 |              |                               |      |              |             |             |             |



CD, Crohn's disease; ITB, intestinal tuberculosis; OR, odds ratio; CI, confidence interval; LR, likelihood ratio; IGRA, interferon-gamma releasing assay; ASCA, anti-Saccharomyces cerevisiae antibody

\*Total numbers of patients are not equal although the studies included are the same between these 2 parameters because diarrhea was not reported in all subjects in one study

# Supplementary Figures Forest plots of each predictive variable

## Demographic data and clinical manifestations

Male gender

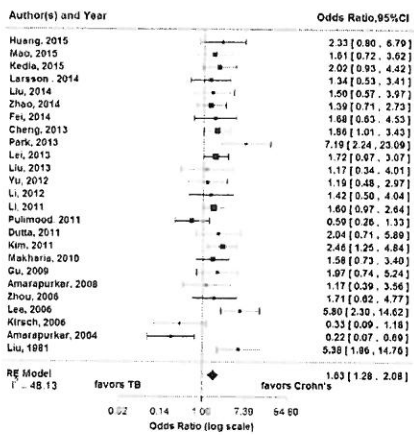

Age

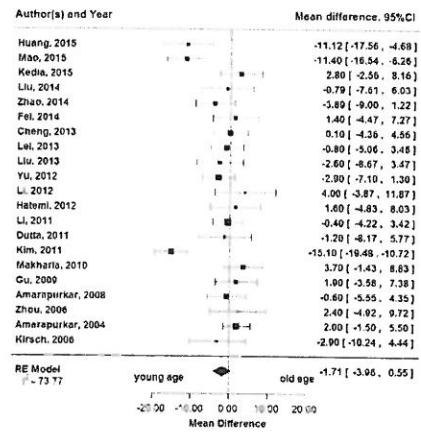

Duration of disease

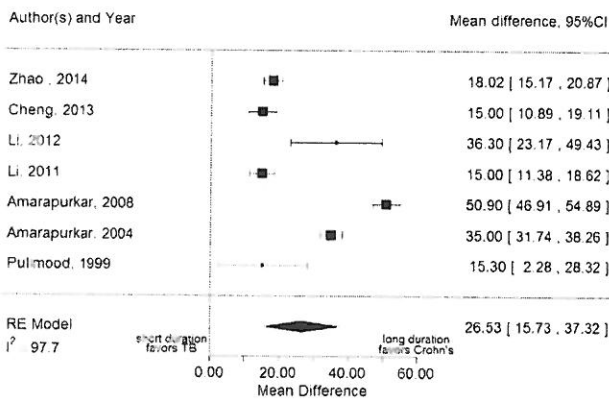

Abdominal pain

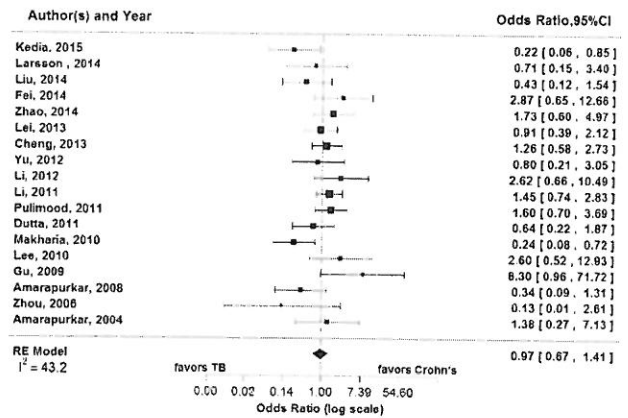

Diarrhea

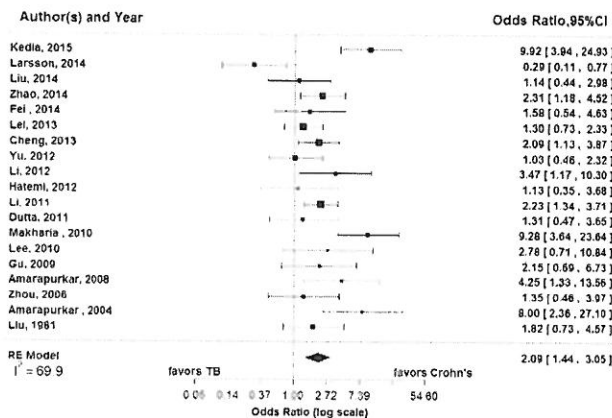

Hematochezia

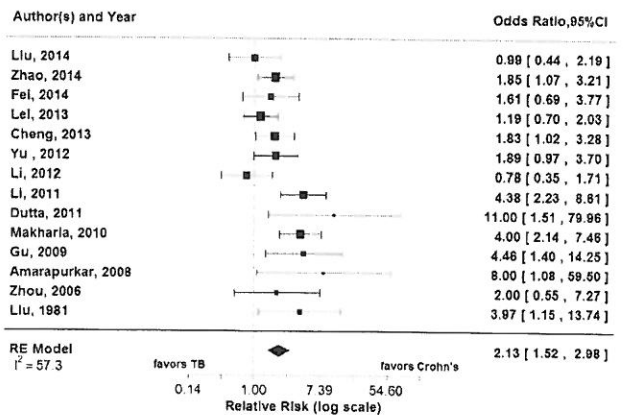

### Perianal disease

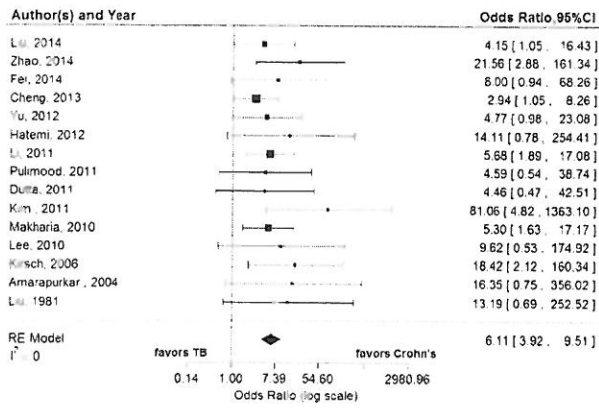

### Intestinal obstruction

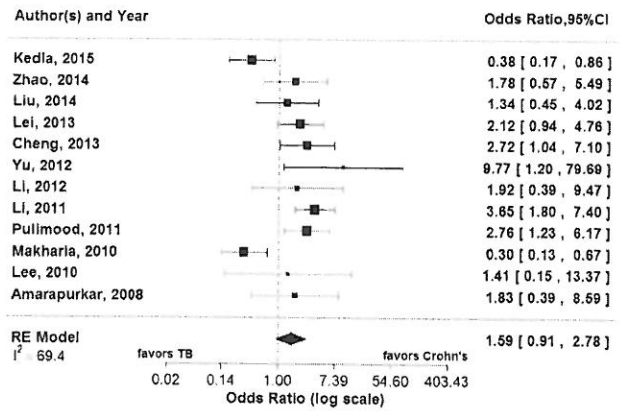

### Abdominal mass

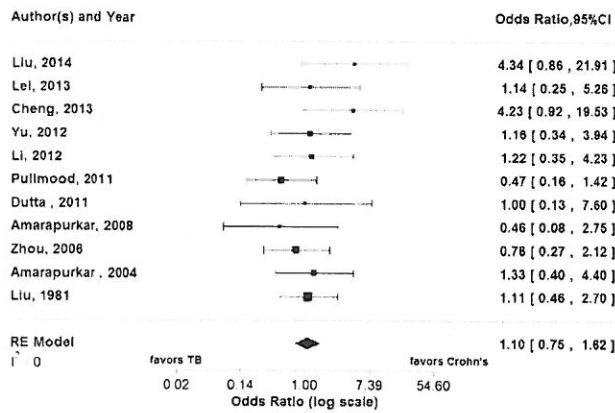

### Fever

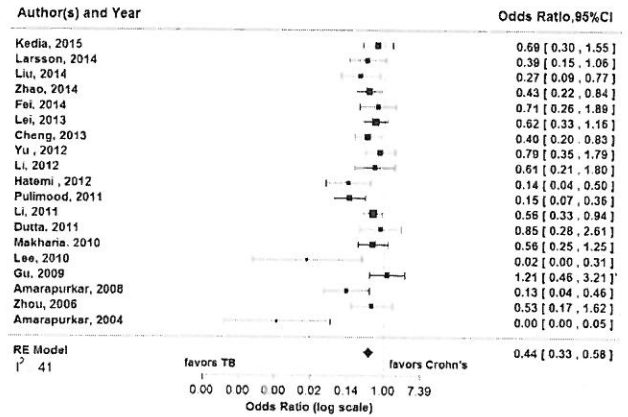

### Weight loss

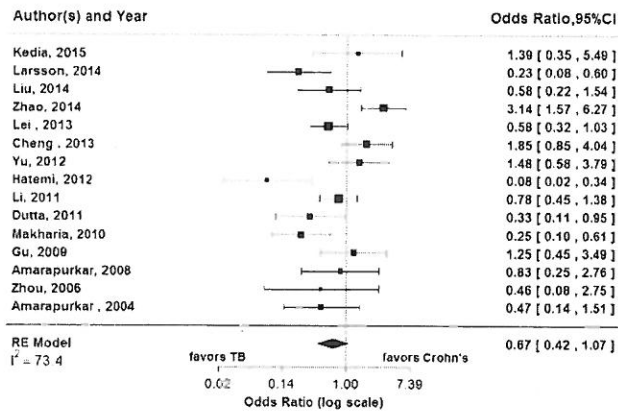

### Night sweat

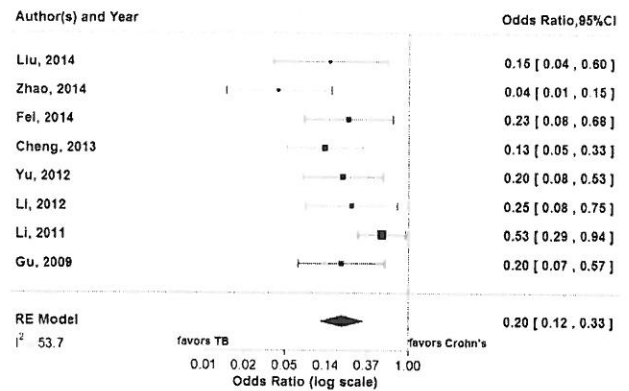

### Anemia

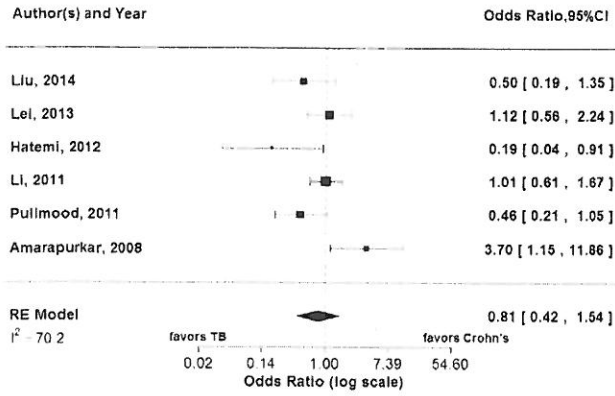

### Lung involvement

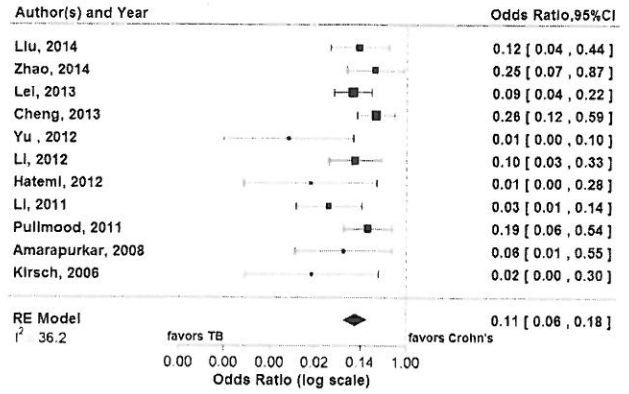

### Ascites

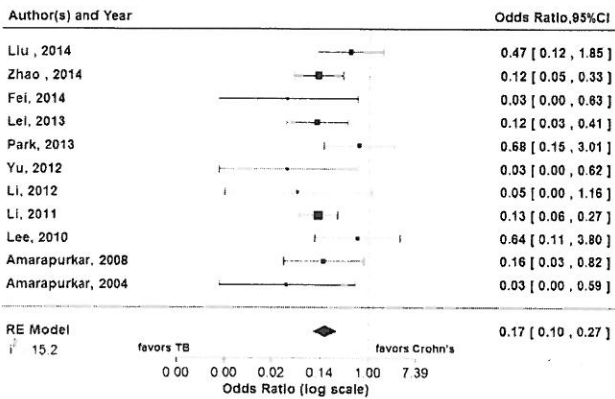

### Extraintestinal manifestation

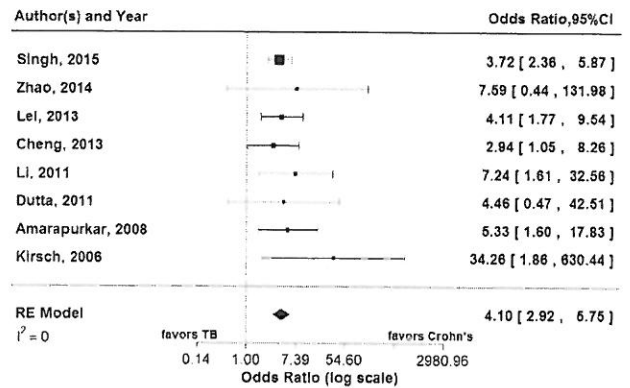

# Inflammatory markers

## Elevated ESR

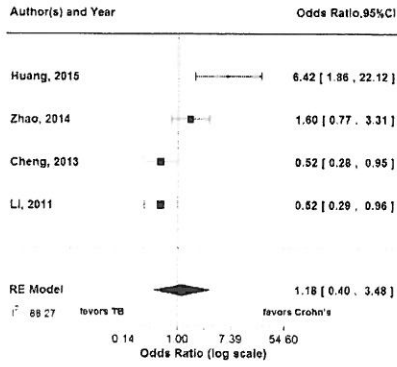

## ESR

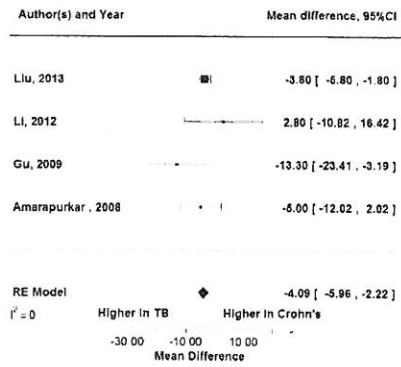

## Elevated CRP

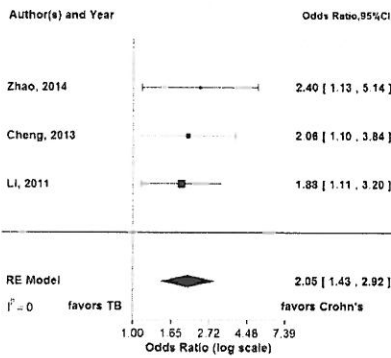

## CRP

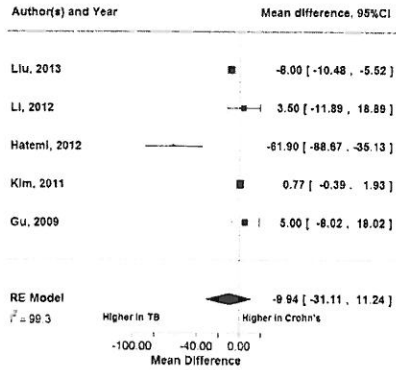

## Albumin level

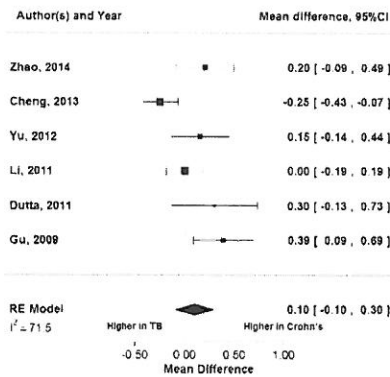

# Endoscopic findings

## Longitudinal ulcers

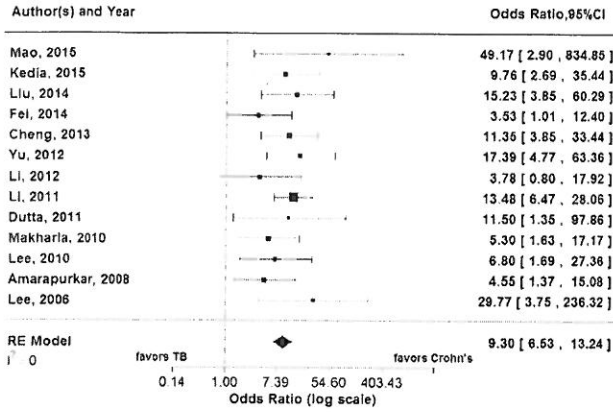

## Transverse ulcers

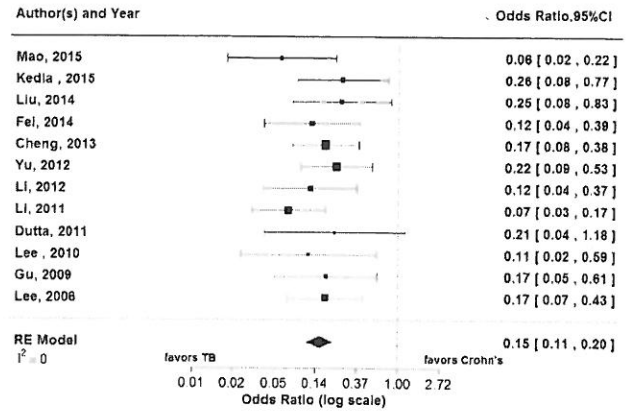

## Aphthous ulcers

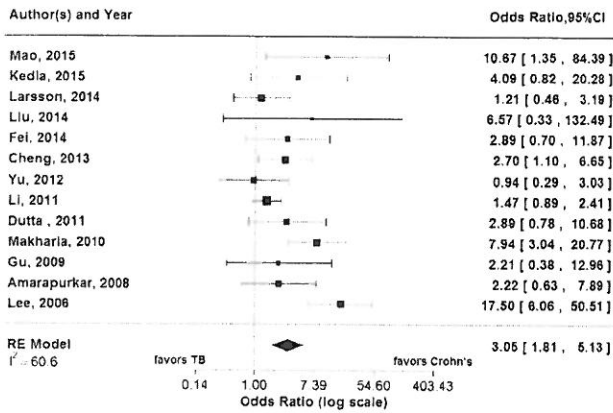

## Cobblestone appearance

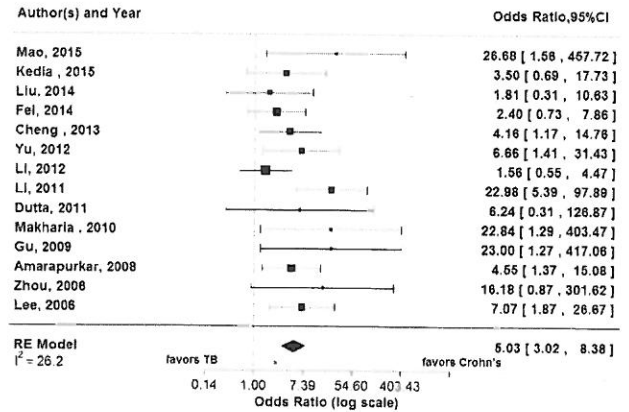

## Patulous IC valve

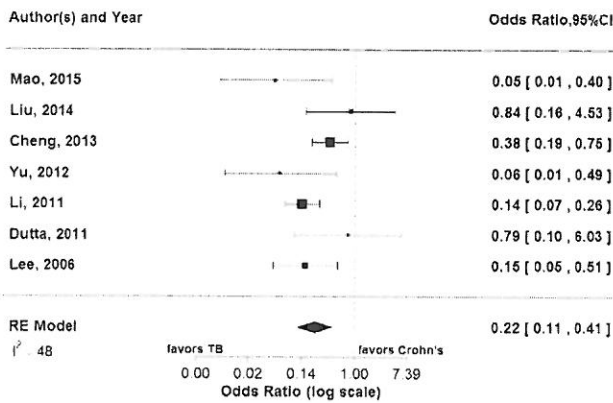

## Pseudopolyps

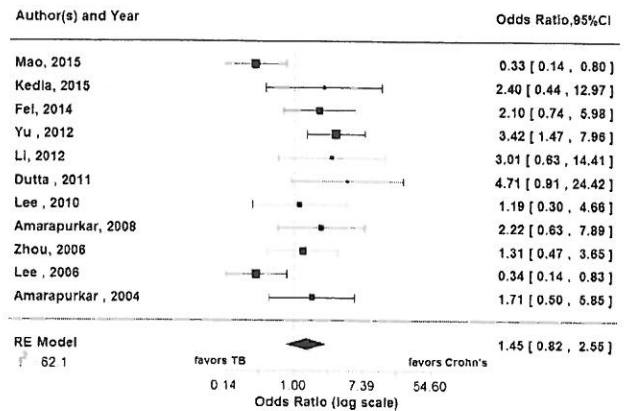

### Stricture

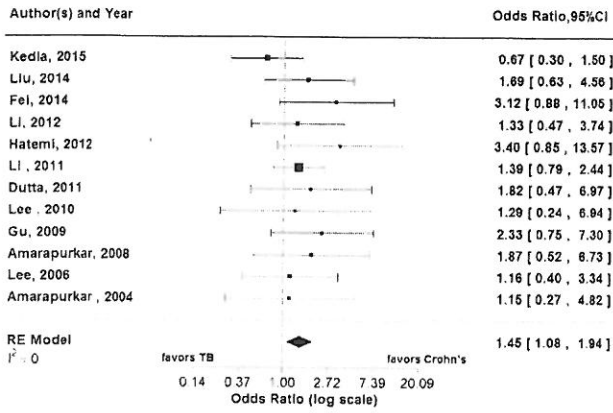

### Mucosal bridge

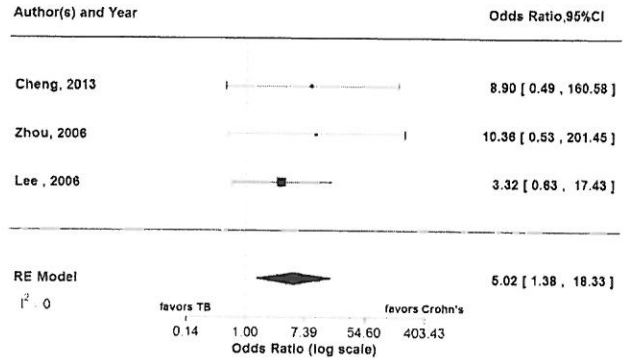

### Skip lesions

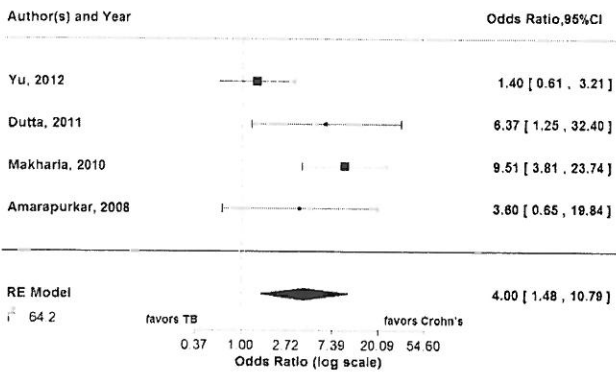

### Nodularity

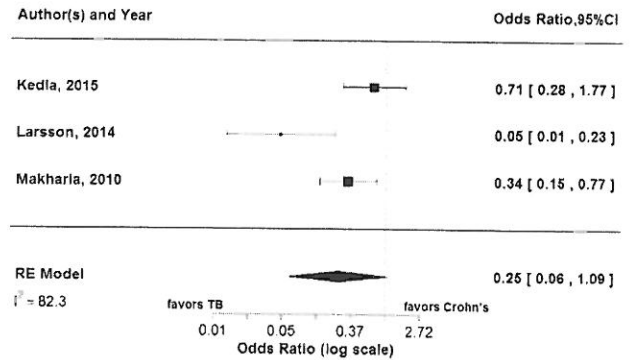

# Location involvement

## Rectal involvement

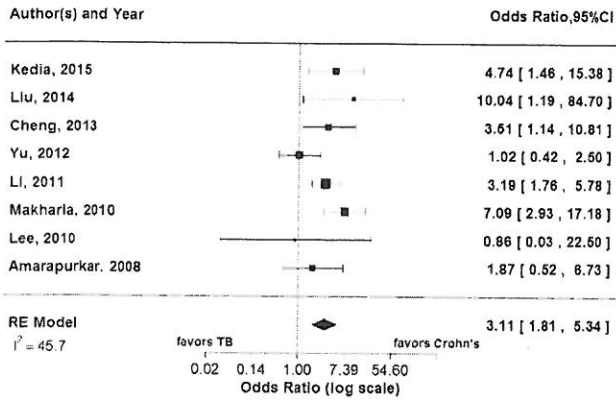

## Sigmoid involvement

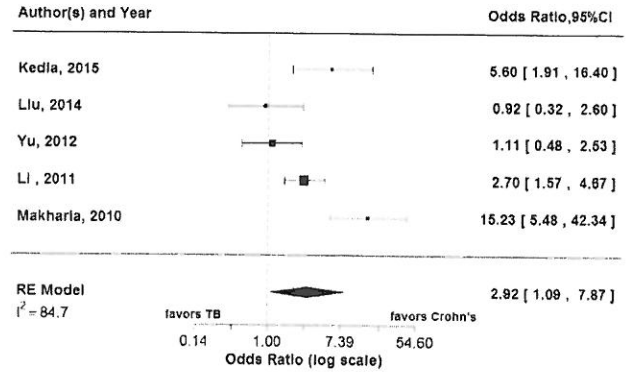

## Descending colonic involvement

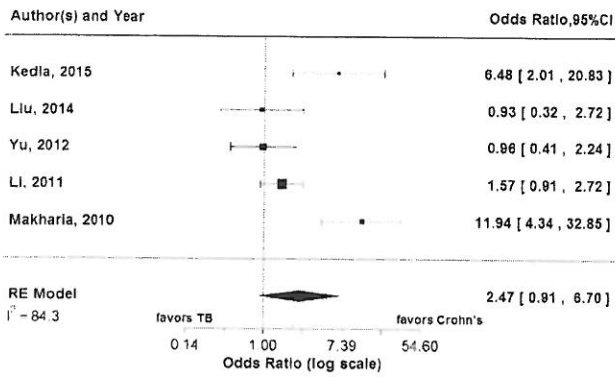

## Transverse colonic involvement

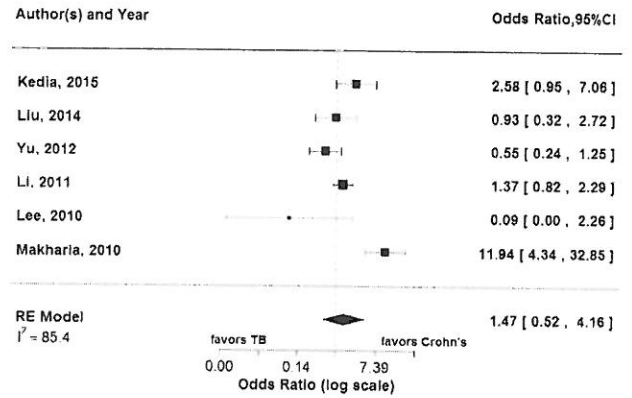

## Ascending colonic involvement

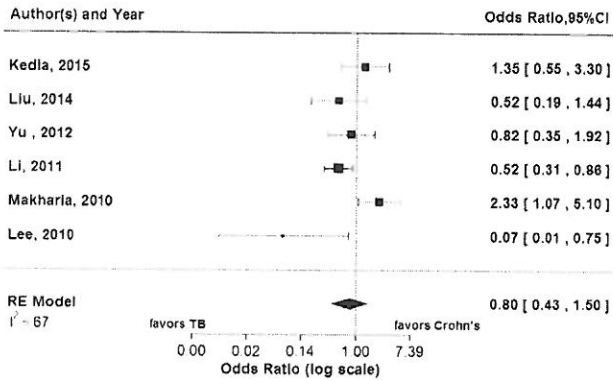

## Cecal involvement

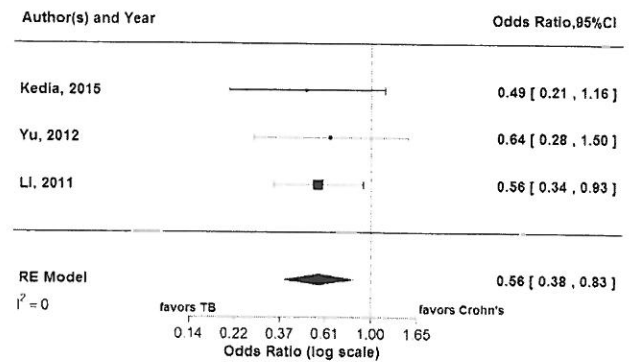



### IC valve involvement

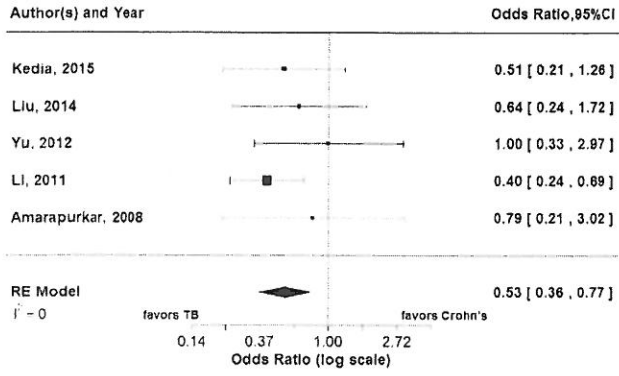

### Ileum involvement

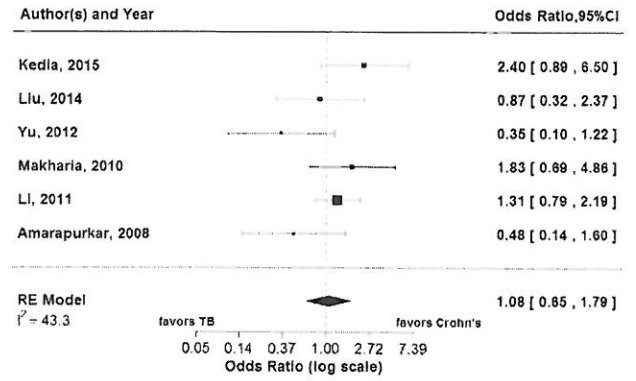

# Pathological findings

## Presence of granuloma(s)

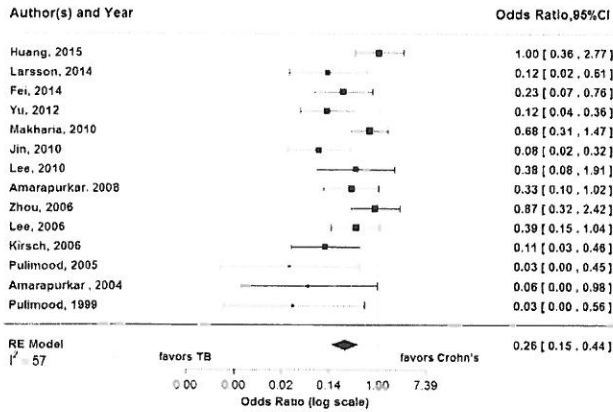

## Confluent granuloma

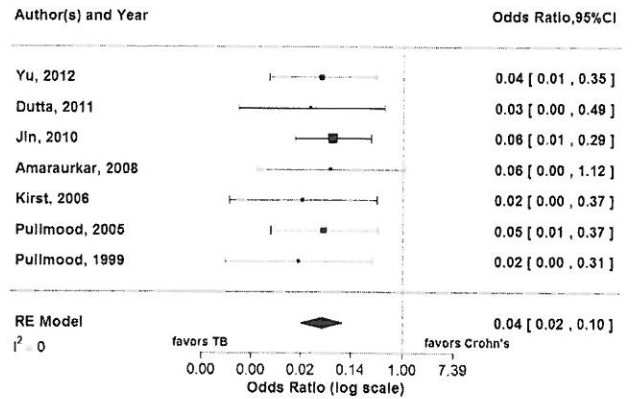

## Large granuloma

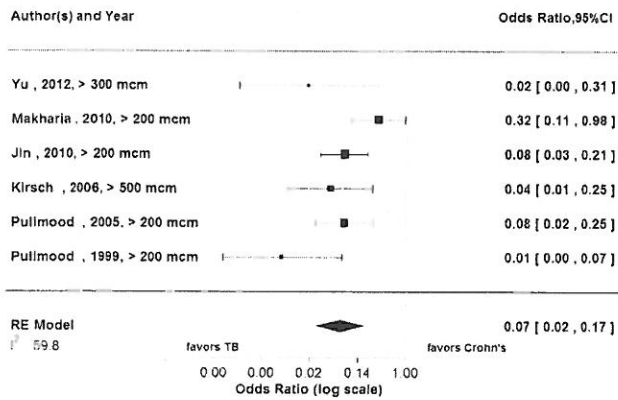

## Multiple granulomas/section

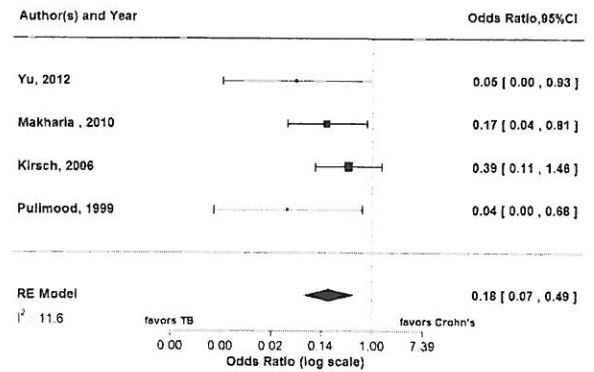

## Mucosal granuloma

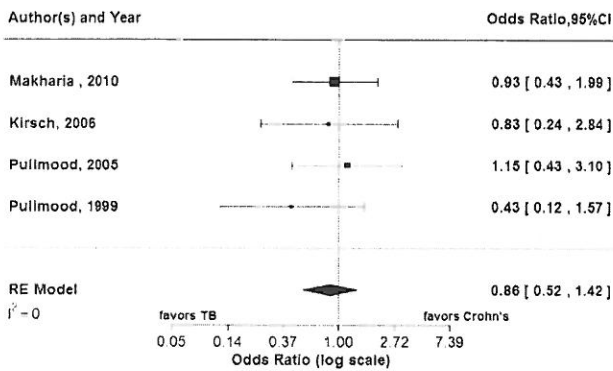

## Submucosal granuloma

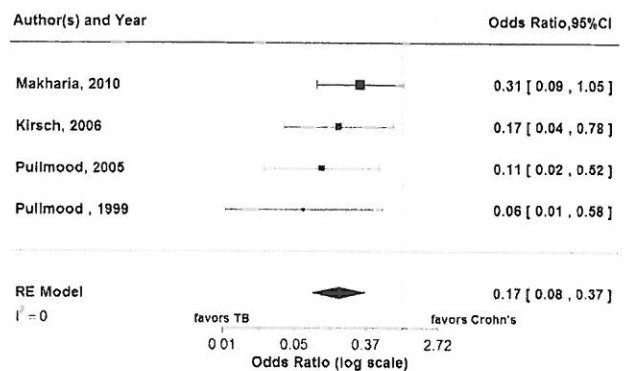

### Microgranuloma

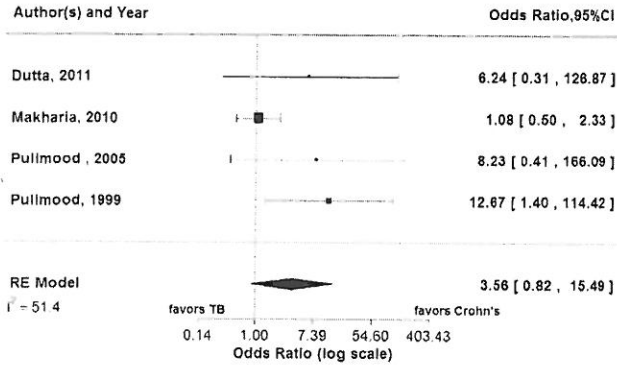

### Cuffing lymphocytes around granuloma

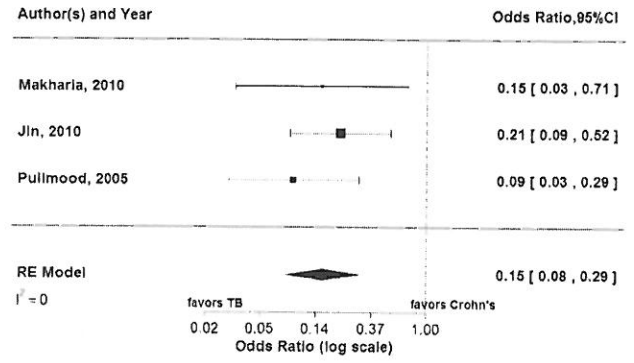

### Ulcer lined by histiocytes

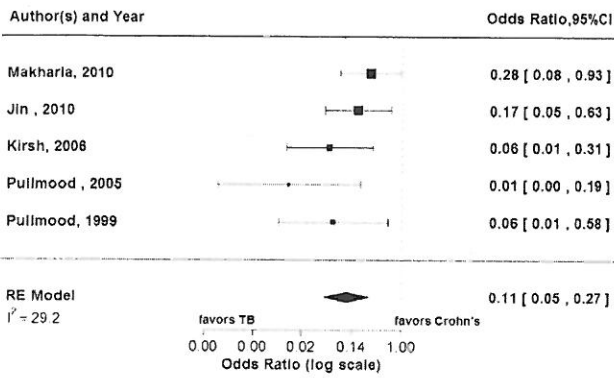

### Disproportionate submucosal inflammation

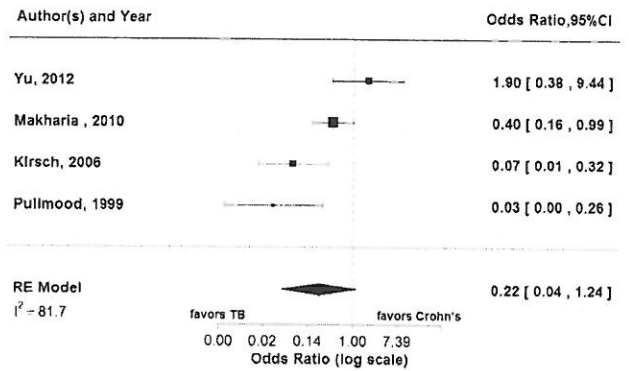

### Focally enhanced colitis

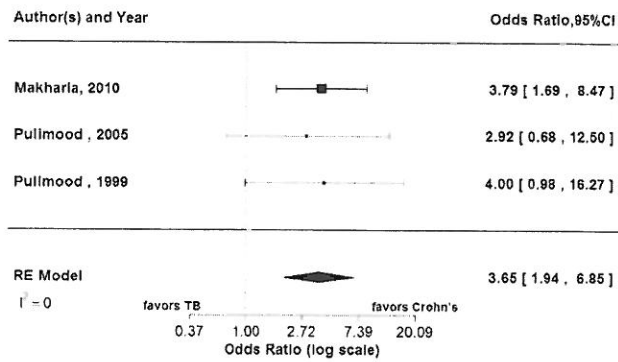

# CT enterography findings

## Short segmental involvement

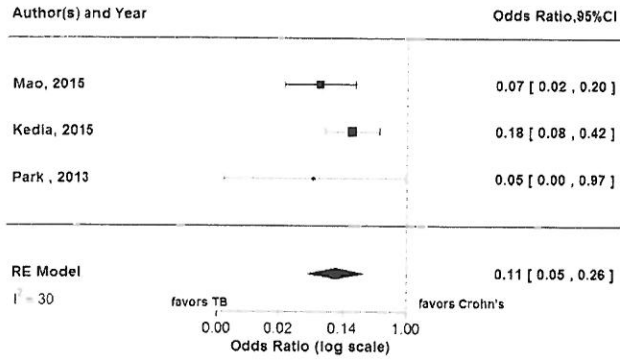

## Wall stratification

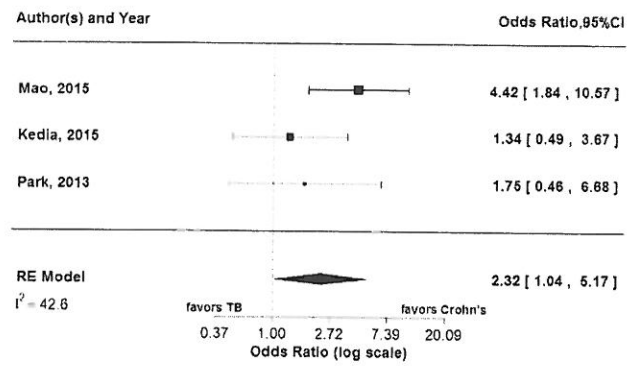

## Asymmetrical wall thickening

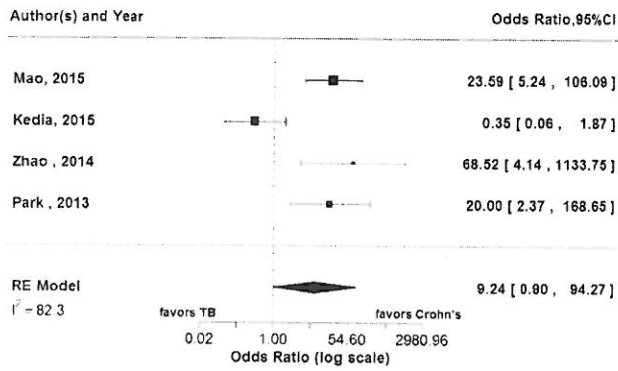

## Comb sign

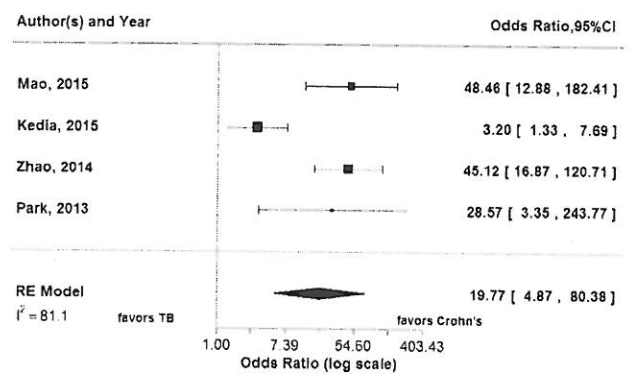

## Fibrofatty proliferation

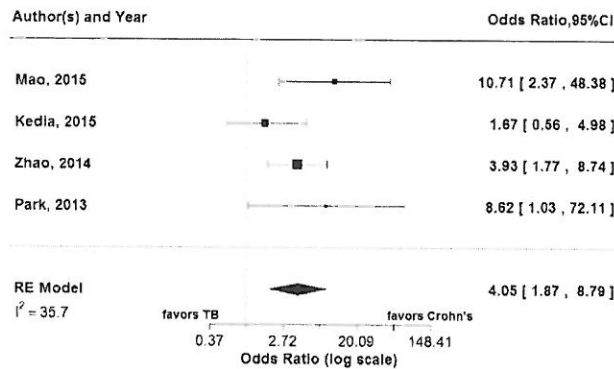

# Interferon-gamma releasing assay and ASCA

Quantiferon-gamma releasing assay

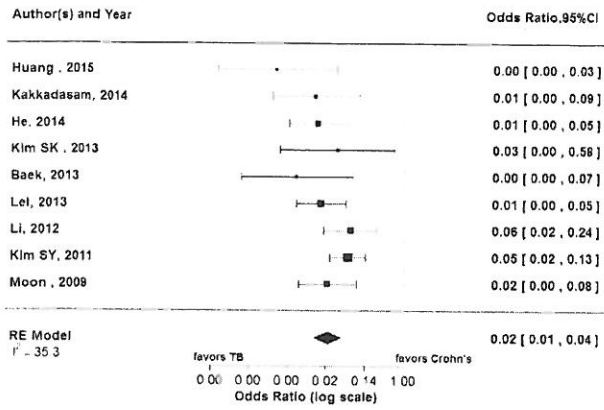

ASCA

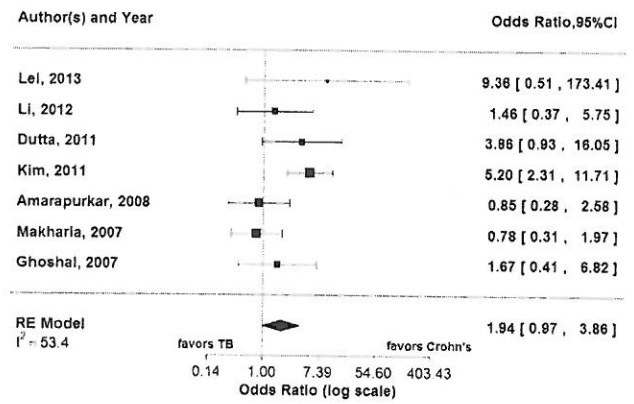

Supplement: NIHMS882345-supplement-Supp882345.pdf [file NIHMS882345-supplement-Supp882345.pdf]
